# Supplementary material for: Tracking SARS-COV-2 Variants Using Nanopore Sequencing in Ukraine in Summer 2021
Source: PubMed Central journal article supplement (PMC8647652; doi:10.21203/rs.3.rs-1044446/v1), 2021-11-30
Supplement: b007fea652a68da9ae46ba22.pdf [file b007fea652a68da9ae46ba22.pdf]

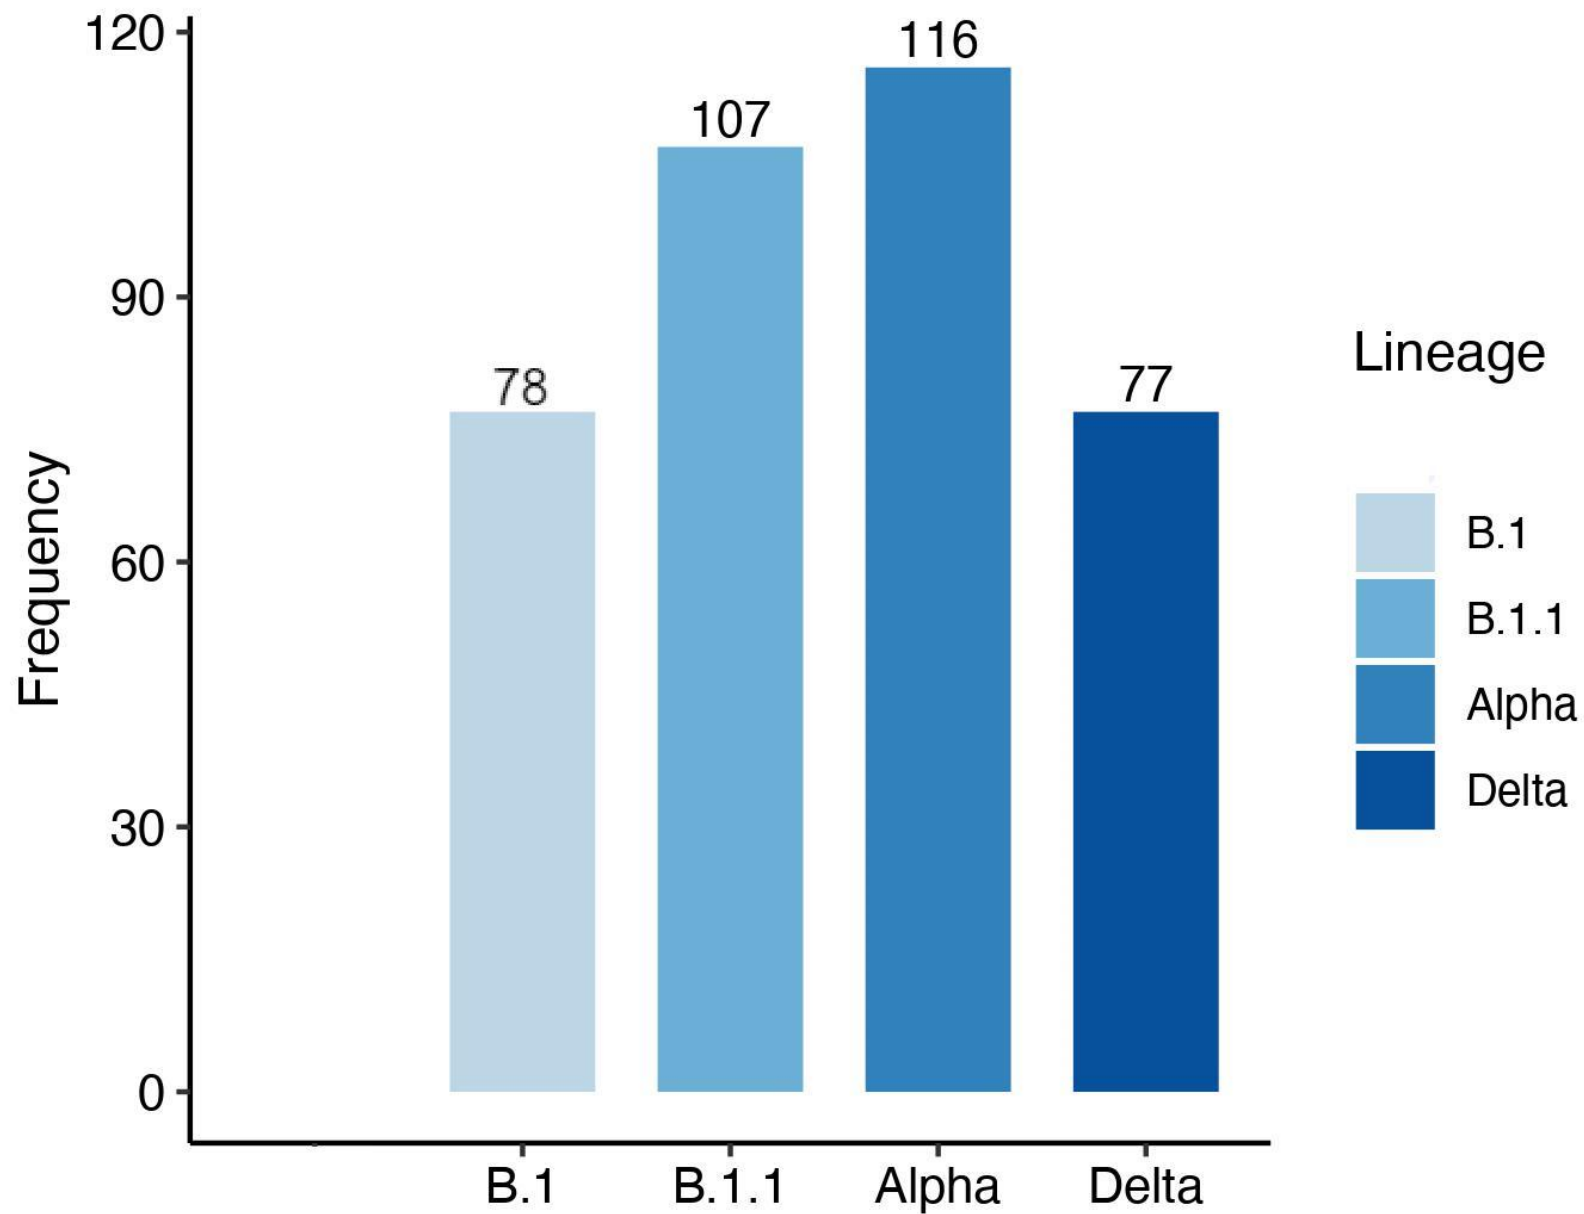

**Figure S1.** The distribution of SARS-CoV-2 predominant lineages and variants of concern in Ukraine.
