# Supplementary material for: Tracking SARS-COV-2 Variants Using Nanopore Sequencing in Ukraine in Summer 2021
Source: PubMed Central journal article supplement (PMC8647652; doi:10.21203/rs.3.rs-1044446/v1), 2021-11-30
Supplement: ebd8373b9a328584ea7ef9e0.pdf [file ebd8373b9a328584ea7ef9e0.pdf]

## Table S4. Acknowledgement GISAID table.

We gratefully acknowledge the following Authors from the Originating laboratories responsible for obtaining the specimens, as well as the Submitting laboratories where the genome data were generated and shared via GISAID, on which this research is based.

All Submitters of data may be contacted directly via [www.gisaid.org](http://www.gisaid.org)

| Accession ID                                                                                                                                                                                                                                                                                                                                                                                                                                                                                                                                                                                                                                                                                                                                                                                                                                   | Originating Laboratory                                                                                                                   | Submitting Laboratory                                                                                                                                  | Authors                                                                                                                                                |                                                                                                                                                                                                                                                                                                                                                                 |
|------------------------------------------------------------------------------------------------------------------------------------------------------------------------------------------------------------------------------------------------------------------------------------------------------------------------------------------------------------------------------------------------------------------------------------------------------------------------------------------------------------------------------------------------------------------------------------------------------------------------------------------------------------------------------------------------------------------------------------------------------------------------------------------------------------------------------------------------|------------------------------------------------------------------------------------------------------------------------------------------|--------------------------------------------------------------------------------------------------------------------------------------------------------|--------------------------------------------------------------------------------------------------------------------------------------------------------|-----------------------------------------------------------------------------------------------------------------------------------------------------------------------------------------------------------------------------------------------------------------------------------------------------------------------------------------------------------------|
| EPI_ISL_1298483, EPI_ISL_1298488                                                                                                                                                                                                                                                                                                                                                                                                                                                                                                                                                                                                                                                                                                                                                                                                               | Bogorodchany CRH                                                                                                                         | The Institute of Molecular Biology and Genetics of NASU                                                                                                | M.Tukalo et al.                                                                                                                                        |                                                                                                                                                                                                                                                                                                                                                                 |
| EPI_ISL_1298474                                                                                                                                                                                                                                                                                                                                                                                                                                                                                                                                                                                                                                                                                                                                                                                                                                | Burshtyn CCH                                                                                                                             | The Institute of Molecular Biology and Genetics of NASU                                                                                                | M.Tukalo et al.                                                                                                                                        |                                                                                                                                                                                                                                                                                                                                                                 |
| EPI_ISL_576146,<br>EPI_ISL_576147,<br>EPI_ISL_576148,<br>EPI_ISL_576149                                                                                                                                                                                                                                                                                                                                                                                                                                                                                                                                                                                                                                                                                                                                                                        | Department of Respiratory & Other Viral Infections of L.V. Gromashevsky Institute of Epidemiology & Infectious Diseases NAMS of Ukraine  | Department of Respiratory & Other Viral Infections of L.V. Gromashevsky Institute of Epidemiology & Infectious Diseases NAMS of Ukraine, JSC "Farmak"  | Alla Mironenko; Andriy Goy; Ihor Kravchuk; Larysa Radchenko; Liudmyla Bolotova; Natalia Teteriuk                                                       |                                                                                                                                                                                                                                                                                                                                                                 |
| EPI_ISL_4260382, EPI_ISL_4260384, EPI_ISL_4260386, EPI_ISL_4260388, EPI_ISL_4260390, EPI_ISL_4260392, EPI_ISL_4260393, EPI_ISL_4260395, EPI_ISL_4260396, EPI_ISL_4260398, EPI_ISL_4260400, EPI_ISL_4260402, EPI_ISL_4260404, EPI_ISL_4260406, EPI_ISL_4260408, EPI_ISL_4260410, EPI_ISL_4260411, EPI_ISL_4260413, EPI_ISL_4260414, EPI_ISL_4260416, EPI_ISL_4260418, EPI_ISL_4260420, EPI_ISL_4260424, EPI_ISL_4260427, EPI_ISL_4260429, EPI_ISL_4260430, EPI_ISL_4260432, EPI_ISL_4260433, EPI_ISL_4260435, EPI_ISL_4260436, EPI_ISL_4260438, EPI_ISL_4260440, EPI_ISL_4260442, EPI_ISL_4260444, EPI_ISL_4260445, EPI_ISL_4260449, EPI_ISL_4260450                                                                                                                                                                                            | see above                                                                                                                                | Department of Respiratory and other Viral Infections of L.V. Gromashevsky Institute of Epidemiology and Infectious Diseases NAMS of Ukraine            | CNR Virus des Infections Respiratoires - France SUD                                                                                                    | Alla Mironenko; Antonin Bal; Bruno Lina; Gregory Destras; Gwendolyne Burfin; Hadrien Regue; Larysa Radchenko; Laurence Josset; Martine Valette; Natalia Teteriuk; Quentin Semanas                                                                                                                                                                               |
| EPI_ISL_582509                                                                                                                                                                                                                                                                                                                                                                                                                                                                                                                                                                                                                                                                                                                                                                                                                                 | Department of Respiratory and other Viral Infections of L.V.Gromashevsky Institute of Epidemiology & Infectious Diseases NAMS of Ukraine | Department of Respiratory and other Viral Infections of L.V.Gromashevsky Institute of Epidemiology & Infectious Diseases NAMS of Ukraine, JSC "Farmak" | Alla Mironenko; Andriy Goy; Ihor Kravchuk; Larysa Radchenko; Liudmyla Bolotova; Natalia Teteriuk                                                       |                                                                                                                                                                                                                                                                                                                                                                 |
| EPI_ISL_582510                                                                                                                                                                                                                                                                                                                                                                                                                                                                                                                                                                                                                                                                                                                                                                                                                                 | Department of Respiratory and other Viral Infections of L.V.Gromashevsky Institute of Epidemiology & Infectious Diseases NAMS of Ukraine | Department of Respiratory and other Viral Infections of L.V.Gromashevsky Institute of Epidemiology & Infectious Diseases NAMS of Ukraine, JSC "Farmak" | Alla Mironenko; Andriy Goy; Ihor Kravchuk; Larysa Radchenko; Liudmyla Bolotova; Natalia Teteriuk                                                       |                                                                                                                                                                                                                                                                                                                                                                 |
| EPI_ISL_582511, EPI_ISL_582512, EPI_ISL_582513, EPI_ISL_654819, EPI_ISL_654820, EPI_ISL_979970, EPI_ISL_979971, EPI_ISL_979972, EPI_ISL_979973, EPI_ISL_1121990, EPI_ISL_1121991, EPI_ISL_1121992, EPI_ISL_1122014, EPI_ISL_1315427, EPI_ISL_1315475, EPI_ISL_1315476, EPI_ISL_1315477, EPI_ISL_1315478                                                                                                                                                                                                                                                                                                                                                                                                                                                                                                                                        | see above                                                                                                                                | Department of Respiratory and other Viral Infections of L.V.Gromashevsky Institute of Epidemiology & Infectious Diseases NAMS of Ukraine               | Department of Respiratory and other Viral Infections of L.V.Gromashevsky Institute of Epidemiology & Infectious Diseases NAMS of Ukraine, JSC "Farmak" | Alla Mironenko; Andriy Goy; Ihor Kravchuk; Larysa Radchenko; Liudmyla Bolotova; Natalia Teteriuk                                                                                                                                                                                                                                                                |
| EPI_ISL_654818                                                                                                                                                                                                                                                                                                                                                                                                                                                                                                                                                                                                                                                                                                                                                                                                                                 | Department of Respiratory and other Viral Infections of L.V.Gromashevsky Institute of Epidemiology & Infectious Diseases NAMS of Ukraine | Department of Respiratory and other Viral Infections of L.V.Gromashevsky Institute of Epidemiology & Infectious Diseases NAMS of Ukraine, JSC "Farmak" | Alla Mironenko; Andriy Goy; Ihor Kravchuk; Larysa Radchenko; Liudmyla Bolotova; Natalia Teteriuk                                                       |                                                                                                                                                                                                                                                                                                                                                                 |
| EPI_ISL_953938, EPI_ISL_954750                                                                                                                                                                                                                                                                                                                                                                                                                                                                                                                                                                                                                                                                                                                                                                                                                 | Diagen                                                                                                                                   | Diagen                                                                                                                                                 | Koliada O                                                                                                                                              |                                                                                                                                                                                                                                                                                                                                                                 |
| EPI_ISL_3253254, EPI_ISL_3253255, EPI_ISL_3253256, EPI_ISL_3253257, EPI_ISL_3253258, EPI_ISL_3253259, EPI_ISL_3253260, EPI_ISL_3253261, EPI_ISL_3253262, EPI_ISL_3253263, EPI_ISL_3253264, EPI_ISL_3253265, EPI_ISL_3253266, EPI_ISL_3253267, EPI_ISL_3253268, EPI_ISL_3253269, EPI_ISL_3253270, EPI_ISL_3253271, EPI_ISL_3253272, EPI_ISL_3253273, EPI_ISL_3253274, EPI_ISL_3253275, EPI_ISL_3253276, EPI_ISL_3253277, EPI_ISL_3253278, EPI_ISL_3253279, EPI_ISL_3253280, EPI_ISL_3253281, EPI_ISL_3253282, EPI_ISL_3253283, EPI_ISL_3253284, EPI_ISL_3253285, EPI_ISL_3253286, EPI_ISL_3253287, EPI_ISL_3253288, EPI_ISL_3253289, EPI_ISL_3253290, EPI_ISL_3253291, EPI_ISL_3253292, EPI_ISL_3253293, EPI_ISL_3253294, EPI_ISL_3253295, EPI_ISL_3253296, EPI_ISL_3253297, EPI_ISL_3314947, EPI_ISL_3314948, EPI_ISL_3314949                  | see above                                                                                                                                | Dutch COVID-19 response team                                                                                                                           | National Institute for Public Health and the Environment (RIVM)                                                                                        | Adam Meijer; AnneMarie van den Brandt; Annelies Kroneman; Bas van der Veer; Chantal Reusken; Dennis Schmitz; Dirk Eggink; Eunice Then; Florian Zwagemaker; Harry Venema; Jeroen Cremer; Karim Hajji; Kim Freriks; Lisa Wijsman; Lynn Aarts; Melissa van Tuil; Rianne Jaarsma; Sanne Bos; Sharon van den Brink; on behalf of the national COVID-19 response team |
| EPI_ISL_1298476,<br>EPI_ISL_1298477,<br>EPI_ISL_1298481                                                                                                                                                                                                                                                                                                                                                                                                                                                                                                                                                                                                                                                                                                                                                                                        | Ivano-Frankivsk CCH#1                                                                                                                    | The Institute of Molecular Biology and Genetics of NASU                                                                                                | M.Tukalo et al.                                                                                                                                        |                                                                                                                                                                                                                                                                                                                                                                 |
| EPI_ISL_1298487                                                                                                                                                                                                                                                                                                                                                                                                                                                                                                                                                                                                                                                                                                                                                                                                                                | Kalush CRH                                                                                                                               | The Institute of Molecular Biology and Genetics of NASU                                                                                                | M.Tukalo et al.                                                                                                                                        |                                                                                                                                                                                                                                                                                                                                                                 |
| EPI_ISL_1298475,<br>EPI_ISL_1298478,<br>EPI_ISL_1298479,<br>EPI_ISL_1298485,<br>EPI_ISL_1298486                                                                                                                                                                                                                                                                                                                                                                                                                                                                                                                                                                                                                                                                                                                                                | Kosov CRH                                                                                                                                | The Institute of Molecular Biology and Genetics of NASU                                                                                                | M.Tukalo et al.                                                                                                                                        |                                                                                                                                                                                                                                                                                                                                                                 |
| EPI_ISL_1298480, EPI_ISL_1298484                                                                                                                                                                                                                                                                                                                                                                                                                                                                                                                                                                                                                                                                                                                                                                                                               | Nadvirna CRH                                                                                                                             | The Institute of Molecular Biology and Genetics of NASU                                                                                                | M.Tukalo et al.                                                                                                                                        |                                                                                                                                                                                                                                                                                                                                                                 |
| EPI_ISL_512597, EPI_ISL_512598, EPI_ISL_512599, EPI_ISL_512600, EPI_ISL_512601, EPI_ISL_512602, EPI_ISL_512603, EPI_ISL_512604, EPI_ISL_512605, EPI_ISL_512606, EPI_ISL_512607, EPI_ISL_512608, EPI_ISL_512609, EPI_ISL_512610, EPI_ISL_512611, EPI_ISL_512612, EPI_ISL_512613, EPI_ISL_512614, EPI_ISL_512615, EPI_ISL_512616, EPI_ISL_512617, EPI_ISL_512618, EPI_ISL_512619, EPI_ISL_512620, EPI_ISL_512621, EPI_ISL_512622, EPI_ISL_512623, EPI_ISL_512624, EPI_ISL_512625, EPI_ISL_512626, EPI_ISL_512627, EPI_ISL_512628, EPI_ISL_512629, EPI_ISL_512630, EPI_ISL_512631, EPI_ISL_512632, EPI_ISL_512633, EPI_ISL_512634, EPI_ISL_512635, EPI_ISL_512636, EPI_ISL_512637, EPI_ISL_512638, EPI_ISL_512639, EPI_ISL_512640, EPI_ISL_512641, EPI_ISL_512642, EPI_ISL_512643, EPI_ISL_512644, EPI_ISL_512810                                 | see above                                                                                                                                | National Laboratory for Influenza/Virology reference laboratory, Public Health Center of the Ministry of Health of Ukraine                             | Respiratory Virus Unit, Microbiology Services Colindale, Public Health England                                                                         | Dr. Iryna Demchyshyna; PHE Covid Sequencing Team                                                                                                                                                                                                                                                                                                                |
| EPI_ISL_4440036, EPI_ISL_4440039, EPI_ISL_4440042, EPI_ISL_4440044, EPI_ISL_4440046, EPI_ISL_4440048, EPI_ISL_4440051, EPI_ISL_4440053, EPI_ISL_4440055, EPI_ISL_4440057, EPI_ISL_4440060, EPI_ISL_4440062, EPI_ISL_4440064, EPI_ISL_4440066, EPI_ISL_4440068, EPI_ISL_4440071, EPI_ISL_4440073, EPI_ISL_4440075, EPI_ISL_4440077, EPI_ISL_4440078, EPI_ISL_4440080, EPI_ISL_4440082, EPI_ISL_4440084, EPI_ISL_4440087, EPI_ISL_4440089, EPI_ISL_4440091, EPI_ISL_4440092, EPI_ISL_4440093, EPI_ISL_4440095, EPI_ISL_4440097, EPI_ISL_4440099, EPI_ISL_4441011, EPI_ISL_4440103                                                                                                                                                                                                                                                                | see above                                                                                                                                | Public Health Center of MHU                                                                                                                            | The Institute of Molecular Biology and Genetics of NASU                                                                                                | M.Tukalo et al.                                                                                                                                                                                                                                                                                                                                                 |
| EPI_ISL_1112293, EPI_ISL_1112294, EPI_ISL_1112295, EPI_ISL_1112296, EPI_ISL_1112297, EPI_ISL_1112298, EPI_ISL_1112299, EPI_ISL_1112300, EPI_ISL_1112301, EPI_ISL_1112302, EPI_ISL_1112303, EPI_ISL_1112304, EPI_ISL_1112305, EPI_ISL_1112306, EPI_ISL_1112307, EPI_ISL_1112308, EPI_ISL_1112309, EPI_ISL_1112310, EPI_ISL_1112311, EPI_ISL_1112312, EPI_ISL_1112313, EPI_ISL_1112314, EPI_ISL_1112315, EPI_ISL_1112316, EPI_ISL_1112317, EPI_ISL_1112318, EPI_ISL_1112319, EPI_ISL_1112320, EPI_ISL_1112321, EPI_ISL_1112322, EPI_ISL_1112323, EPI_ISL_1112324, EPI_ISL_1112325, EPI_ISL_1112326, EPI_ISL_1112327, EPI_ISL_1112328, EPI_ISL_1112329, EPI_ISL_1112330, EPI_ISL_1112331, EPI_ISL_1112332, EPI_ISL_1112333, EPI_ISL_1112334, EPI_ISL_1112335, EPI_ISL_1112336, EPI_ISL_1112337, EPI_ISL_1112338, EPI_ISL_1112339, EPI_ISL_1112753 | see above                                                                                                                                | Public Health Center of Ukraine                                                                                                                        | Charité Universitätsmedizin Berlin, Institute of Virology                                                                                              | Barbara Mühlemann; Christian Drosten; Ihor Kuzin; Iryna Demchyshyna; Julia Schneider; Jörn Beheim-Schwarzbach; Liudmyla Chernenko; Roman Rodyna; Talitha Veith; Terry Jones; Victor M Corman                                                                                                                                                                    |
| EPI_ISL_2934571,<br>EPI_ISL_2934572,<br>EPI_ISL_2934575,<br>EPI_ISL_2966511,<br>EPI_ISL_2966513                                                                                                                                                                                                                                                                                                                                                                                                                                                                                                                                                                                                                                                                                                                                                | SE Kyiv CDC MHU                                                                                                                          | The Institute of Molecular Biology and Genetics of NASU                                                                                                | M.Tukalo et al.                                                                                                                                        |                                                                                                                                                                                                                                                                                                                                                                 |
| EPI_ISL_2934569,<br>EPI_ISL_2934570,<br>EPI_ISL_2934573,<br>EPI_ISL_2934574,<br>EPI_ISL_2966512                                                                                                                                                                                                                                                                                                                                                                                                                                                                                                                                                                                                                                                                                                                                                | SECP MHU                                                                                                                                 | The Institute of Molecular Biology and Genetics of NASU                                                                                                | M.Tukalo et al.                                                                                                                                        |                                                                                                                                                                                                                                                                                                                                                                 |
| EPI_ISL_3262118, EPI_ISL_3262119, EPI_ISL_3262120, EPI_ISL_3262121, EPI_ISL_3262122, EPI_ISL_3262123, EPI_ISL_3262124, EPI_ISL_3262125, EPI_ISL_3262126, EPI_ISL_3262127, EPI_ISL_3262128, EPI_ISL_3262129, EPI_ISL_3262130, EPI_ISL_3262131, EPI_ISL_3262132, EPI_ISL_3262133, EPI_ISL_3262134, EPI_ISL_3262135, EPI_ISL_3262136, EPI_ISL_3262137, EPI_ISL_3262138                                                                                                                                                                                                                                                                                                                                                                                                                                                                            | see above                                                                                                                                | SI «Public Health Center of MHU»                                                                                                                       | The Institute of Molecular Biology and Genetics of NASU                                                                                                | M.Tukalo et al.                                                                                                                                                                                                                                                                                                                                                 |
| EPI_ISL_1495111, EPI_ISL_1495112, EPI_ISL_1495113, EPI_ISL_1495114, EPI_ISL_1495115, EPI_ISL_1495116, EPI_ISL_1495117, EPI_ISL_1495118, EPI_ISL_1495119, EPI_ISL_1495120, EPI_ISL_1495121, EPI_ISL_1495122, EPI_ISL_1495123, EPI_ISL_1495124, EPI_ISL_1495125, EPI_ISL_1495126, EPI_ISL_1495127, EPI_ISL_1495128, EPI_ISL_1495129, EPI_ISL_1495130, EPI_ISL_1495131, EPI_ISL_1495132, EPI_ISL_1495133, EPI_ISL_1495134, EPI_ISL_1495135, EPI_ISL_1495136, EPI_ISL_1495137, EPI_ISL_1495138, EPI_ISL_1495139, EPI_ISL_1495140, EPI_ISL_1495141, EPI_ISL_1495142, EPI_ISL_1495143                                                                                                                                                                                                                                                                | see above                                                                                                                                | State Institution «Public Health Center of Ministry of Health of Ukraine»                                                                              | Robert Koch Institute, ZBS1 Highly Pathogenic Viruses, Berlin, Germany                                                                                 | Andreas Nitsche; Annika Brinkmann; Iryna Demchyshyna; Janine Michel; Liudmyla Chernenko; Roman Rodyna; Steven Uddin                                                                                                                                                                                                                                             |
| EPI_ISL_1298482                                                                                                                                                                                                                                                                                                                                                                                                                                                                                                                                                                                                                                                                                                                                                                                                                                | Tysmenytsia CH                                                                                                                           | The Institute of Molecular Biology and Genetics of NASU                                                                                                | M.Tukalo et al.                                                                                                                                        |                                                                                                                                                                                                                                                                                                                                                                 |

| Accession ID                                                                                                                                                                                                                                                                                                                                                                     | Originating Laboratory                                                                                                                                                                                                                                                           | Submitting Laboratory                                                                                                                                                                                                                            | Authors                                                                                                                                                                                                                                                                                                                                                                                                        |
|----------------------------------------------------------------------------------------------------------------------------------------------------------------------------------------------------------------------------------------------------------------------------------------------------------------------------------------------------------------------------------|----------------------------------------------------------------------------------------------------------------------------------------------------------------------------------------------------------------------------------------------------------------------------------|--------------------------------------------------------------------------------------------------------------------------------------------------------------------------------------------------------------------------------------------------|----------------------------------------------------------------------------------------------------------------------------------------------------------------------------------------------------------------------------------------------------------------------------------------------------------------------------------------------------------------------------------------------------------------|
| EPI_ISL_733077, EPI_ISL_733078, EPI_ISL_733151, EPI_ISL_733433, EPI_ISL_733452, EPI_ISL_1400527, EPI_ISL_1400557<br>see above                                                                                                                                                                                                                                                    | HELIX LLC                                                                                                                                                                                                                                                                        | WHO National Influenza Centre Russian Federation                                                                                                                                                                                                 | Andrey Komissarov; Anna Ivanova; Artem Fadeev; Daria Danilenko; Dmitry Bazhenov; Dmitry Lioznov; Elena Nabieva; Georgii Bazykin; Ksenia Safina; Kseniya Komissarova                                                                                                                                                                                                                                            |
| EPI_ISL_3932047,<br>EPI_ISL_3996685,<br>EPI_ISL_3996686,<br>EPI_ISL_3996687,<br>EPI_ISL_3996688<br>EPI_ISL_2031957                                                                                                                                                                                                                                                               | Molecular Diagnostic Laboratory of Federal Budget Institution of Science at the Central Research Institute of Epidemiology Group of Genomics and Postgenomic Technologies of Central<br>of the Federal Service on Customers' Rights Protection and Human Well-being Surveillance | Research Institute of Epidemiology                                                                                                                                                                                                               | Akimkin V.G.; Berlina Y.Y.; Buharina A.Y.; Kaptelova V.V.; Kondrasheva L.Y.; Korneenko E.V.; Nadtoka M.I.; Roev G.V.; Saenko S.S.; Samoilov A.E.; Shipulina O.Y.;<br>Sinityn S.O.; Smirnova Y.S.; Speranskaya A.S.; Vyhodceva A.V.                                                                                                                                                                             |
| EPI_ISL_3101330, EPI_ISL_3101347                                                                                                                                                                                                                                                                                                                                                 | Molecular diagnostic laboratory of Federal Budget Institution of Science "Central Research Institute of Epidemiology" of<br>The Federal Service on Customers' Rights Protection and Human Well-being Surveillance                                                                | Group of Genomics and Postgenomic Technologies of Central Akimkin V.G.; Kaptelova V.V.; Kondrasheva L.Y.; Korneenko E.V.; Nadtoka M.I.; Saenko S.S.; Samojlov A.E.; Shipulina O.Y.; Sinicyn S.O.; Smirnova Y.S.; Speranskaya A.S.; Tivanova E.V. |                                                                                                                                                                                                                                                                                                                                                                                                                |
| EPI_ISL_3122988, EPI_ISL_3122989, EPI_ISL_3122990, EPI_ISL_3122991, EPI_ISL_3122992, EPI_ISL_3122993, EPI_ISL_3122994, EPI_ISL_3122995, EPI_ISL_3122996, EPI_ISL_3122997, EPI_ISL_3122998, EPI_ISL_3122999, EPI_ISL_3123000, EPI_ISL_3123001, EPI_ISL_3123002, EPI_ISL_3123003, EPI_ISL_3123004, EPI_ISL_3123005, EPI_ISL_3123006, EPI_ISL_3123007, EPI_ISL_3123008<br>see above | Molecular diagnostic laboratory of Federal Budget Institution of Science "Central Research Institute of Epidemiology" of<br>The Federal Service on Customers' Rights Protection and Human Well-being Surveillance<br>Republican Children's Clinical Infectious Diseases Hospital | Research Institute of Epidemiology<br>WHO National Influenza Centre Russian Federation                                                                                                                                                           | Akimkin V.G.; Berlina Y.Y.; Bulanenko V.P.; Cherkashina A.S.; Dohoyan A.Y.; Golubeva A.G.; Kaptelova V.V.; Kondrasheva L.Y.; Korneenko E.V.; Nadtoka M.I.; Saenko S.S.; Samoilov A.E.; Shipulina O.Y.; Smirnova Y.S.; Solovieva E.D.; Speranskaya A.S.; Valdohina A.V.; Zotova M.I.; Zuev S.N.                                                                                                                 |
| EPI_ISL_428901                                                                                                                                                                                                                                                                                                                                                                   | State Research Center of Virology and Biotechnology VECTOR, Department of Collection of Microorganisms                                                                                                                                                                           | State Research Center of Virology and Biotechnology VECTOR, Department of Collection of Microorganisms                                                                                                                                           | Alexey Masharsky; Andrey Komissarov; Artem Fadeev; Daria Danilenko; Dmitry Lioznov; Elena Nabieva; Georgii Bazykin; Kirill Varchenko; Ksenia Safina; Kseniya Komissarova; Maria Baturova; Maria Pisareva; Mikhail Bakaev; Nikita Yolshin; Oula Mansour; Tamila Musaeva; Veronika Eder<br>Alexander N. Shvalov; Elena V. Gavrilova; Oleg V. Pyankov; Rinat A. Maksyutov; Sergey A. Bodnev; Tatyana V. Tregubcha |

**Accession ID**

EPI\_ISL\_4536678, EPI\_ISL\_4536683,  
EPI\_ISL\_4536741, EPI\_ISL\_4536770,  
EPI\_ISL\_4558178

**Originating Laboratory**

Molecular diagnostic laboratory of Federal Budget Institution of Science "Central Research Institute of Epidemiology" of The Federal Service on Customers' Rights Protection and Human Well-being Surveillance

**Submitting Laboratory**

Group of Genomics and Postgenomic Technologies of Central Research Institute of Epidemiology

**Authors**

Akimkin V.G.; Buharina A.Y.; Kondrasheva L.Y.; Korneenko E.V.; Nadtoka M.I.; Roev G.V.; Samoilov A.E.; Shipulina O.Y.; Sinitsyn S.O.; Smimova Y.S.; Speranskaya A.S.; Svetlichnyj D.V.; Vyhodceva A.V.
