# Supplementary material for: Tracking SARS-COV-2 Variants Using Nanopore Sequencing in Ukraine in Summer 2021
Source: Res Sq. 2021 Nov 30:rs.3.rs-1044446. Preprint. [Version 1] doi: 10.21203/rs.3.rs-1044446/v1 (PMC8647652; doi:10.21203/rs.3.rs-1044446/v1)
Supplement: Supplement 2 [file 47cac5e489b059d39e03c745.xlsx]

## Sheet: SupplementaryTableS1
Table S1. Characterization of SARS-CoV-2 genetic sequences that were obtained in this study using Nanopore sequencing technology.
Sample #	GISAID accession number	Lab ID	Sex	Collection date	Ct	[Amplicon] (ng/ul)	Coverage, %	Pango lineage	Variant	NextClade clade	Total nt Substitutions	Total nt Deletions	Total aa Substitutions	Total aa Deletions	Total Ns	Amplicon dropouts (Artic V3 primers)
1	EPI_ISL_5852904	COVID1	M	22.07.2021	12.01	20	98.6	AY.4	Delta (B.1.617.2-like)	21A (Delta)	40	12	32	4	397	72
2	EPI_ISL_5859548	COVID3	M	22.07.2021	8.22	34	98.3	AY.4	Delta (B.1.617.2-like)	21A (Delta)	40	109	30	34	397	72
3	EPI_ISL_5852905	COVID4	F	21.07.2021	14.46	18	98.6	AY.4	Delta (B.1.617.2-like)	21A (Delta)	42	12	32	4	397	72
4	EPI_ISL_5852906	COVID5	F	20.07.2021	9.27	32	99.5	B.1.1.7	Alpha (B.1.1.7-like)	20I (Alpha, V1)	44	19	26	6	123	-
5	EPI_ISL_5852907	COVID6	M	20.07.2021	18.34	6,8	97.8	B.1.1.7	B.1.1.7-like+E484K	20I (Alpha, V1)	41	25	26	8	640	-
6	EPI_ISL_5852908	COVID7	F	21.07.2021	7.96	31	98.6	AY.4	Delta (B.1.617.2-like)	21A (Delta)	40	12	33	4	397	72
7	EPI_ISL_5852909	COVID8	F	22.07.2021	13.77	22	98.6	AY.4	Delta (B.1.617.2-like)	21A (Delta)	38	12	31	4	397	72
8	EPI_ISL_5852910	COVID9	F	21.07.2021	15.86	12	98.6	AY.4	Delta (B.1.617.2-like)	21A (Delta)	38	12	32	4	397	72
9	EPI_ISL_5852911	COVID10	M	21.07.2021	18.39	8,8	98.5	AY.36	Delta (B.1.617.2-like)	21A (Delta)	38	27	32	9	397	72
10	EPI_ISL_5852912	COVID11	F	23.07.2021	14.19	14	94.3	AY.5	Delta (B.1.617.2-like)	21A (Delta)	38	12	31	4	1699	64, 72
11	EPI_ISL_5852913	COVID12	F	25.07.2021	13.85	20	97.6	AY.4	Delta (B.1.617.2-like)	21A (Delta)	40	12	33	4	692	64, 72
12	EPI_ISL_5852914	COVID13	F	21.07.2021	19.44	8,2	96.5	AY.24	Delta (B.1.617.2-like)	21A (Delta)	34	84	29	28	943	64, 72
13	EPI_ISL_5852915	COVID14	F	22.07.2021	11.27	24	97.7	AY.4	Delta (B.1.617.2-like)	21A (Delta)	41	12	31	4	678	72
14	EPI_ISL_5852916	COVID15	F	22.07.2021	11.78	28	97.6	AY.4	Delta (B.1.617.2-like)	21A (Delta)	39	12	34	4	692	64, 72
15	EPI_ISL_5852917	COVID16	F	22.07.2021	7.36	30	96.7	AY.4	Delta (B.1.617.2-like)	21A (Delta)	42	12	35	4	971	64, 72
16	EPI_ISL_5852918	COVID17	M	21.07.2021	14.63	20	98.6	AY.33	Delta (B.1.617.2-like)	21A (Delta)	39	12	33	4	397	72
17	EPI_ISL_5852919	COVID18	M	21.07.2021	8.54	34	97.6	AY.36	Delta (B.1.617.2-like)	21A (Delta)	37	12	31	4	692	64, 72
18	EPI_ISL_5852920	COVID19	F	23.07.2021	14.84	13	97.6	AY.33	Delta (B.1.617.2-like)	21A (Delta)	42	12	33	4	692	64, 72
19	EPI_ISL_5852921	COVID20	F	21.07.2021	18.01	6,0	91.7	AY.23	Delta (B.1.617.2-like)	21A (Delta)	34	6	27	2	2483	64, 72
20	EPI_ISL_5852922	COVID21	F	22.07.2021	8.87	32	97.6	AY.4	Delta (B.1.617.2-like)	21A (Delta)	35	12	30	4	692	64, 72
21	EPI_ISL_5852923	COVID22	F	20.07.2021	12.25	21	96.9	AY.4	Delta (B.1.617.2-like)	21A (Delta)	38	12	31	4	904	64, 72
22	EPI_ISL_5852924	COVID23	F	23.07.2021	11.26	23	94.1	AY.4	Delta (B.1.617.2-like)	21A (Delta)	35	6	27	2	1751	64, 72
23	EPI_ISL_5852925	COVID25	M	22.07.2021	4.91	24	96.7	AY.4	Delta (B.1.617.2-like)	21A (Delta)	39	12	33	4	966	64, 72
24	EPI_ISL_5852926	COVID26	M	23.07.2021	15.18	3.56	95	B.1.1.7	Alpha (B.1.1.7-like)	20I (Alpha, V1)	23	19	14	6	1641	-

## Sheet: SupplementaryTableS2
Table S2. PANGO lineage assignment for the 355 SARS-CoV-2 sequences available from Ukraine.
Time period	Lineage (Pango)	Description and the closest country of origin	#seq	B*	B & B.1 sub-lineages	B.1.1 sub-lineages	Alpha	Alpha-like	Delta	Delta-like	Total
"Pre-Wave" (Until 31 Aug 2020)	B	Second major haplotype (and first to be discovered)	1	1	38	28	0	0	0	0	67
	B.1	A large European lineage the origin of which roughly corresponds to the Northern Italian outbreak early in 2020	31
	B.1.1	European lineage	19
	B.1.1.243	Eastern Europe, Central Europe, UK	5
	B.1.1.194	England	1
	B.1.131	European lineage	2
	B.1.527	Czech Republic/ Ukraine lineage	4
	B.1.223	UK lineage	1
	B.1.1.1	England	1
	B.1.1.325	Eastern Europe plus Belgium and Denmark	2
"Wave 1" (01 Sep 2020 - 31 Jan 2021)	B.1.1	European lineage	16	0	37	70	0	0	0	0	107
	B.1.1.274	England, Thailand, Russia, USA	1
	B.1.1.349	Russia, Democratic Republic of the Congo	1
	B.1.1.373	Russian lineage	1
	B.1.1.243	Eastern Europe, Central Europe, UK	12
	B.1.1.351	USA, England, Finland, Denmark	9
	B.1	A large European lineage the origin of which roughly corresponds to the Northern Italian outbreak early in 2020	19
	B.1.2	USA	2
	B.1.127	Denmark	2
	B.1.258	UK lineage	1
	B.1.1.159	European lineage	14
	B.1.221	European lineage	2
	B.1.131	European lineage	3
	B.1.177.44	Swiss mostly	1
	B.1.243	USA lineage	1
	B.1.1.325	Eastern Europe plus Belgium and Denmark	1
	B.1.1.311	Huge UK lineage	1
	B.1.1.1	England	4
	B.1.77	English lineage	1
	B.1.1.317	Russian lineage	2
	B.1.1.236	UK	2
	B.1.36.8	Prodominantly Indian lineage with global records	1
	B.1.1.294	Russian and UK lineage	2
	B.1.1.370	England, USA, Russia, Germany	1
	B.1.422	Canada mostly	1
	B.1.1.39	Mostly Switzerland with lots of other countries	2
	B.1.527	Czech Republic/ Ukraine lineage	1
	B.1.1.57	South African lineage	1
	B.1.627	USA, Mexico and Honduras lineage	2
"Wave 2" (01 Feb 2021 - 09 Jun 2021)	B.1.1.7 (Alpha)	UK lineage of concern, associated with the N501Y mutation.	85	0	1	5	85	1	1	0	93
	AT.1	Russia and Finland lineage	1
	B.1.1.374	Balkans, Finland	1
	B.1.1.351	USA, England, Finland, Denmark	1
	B.1.1.398	USA/ Indonesian lineage	1
	Q.8 (Alpha-like)	Sri Lanka lineage	1
	B.1	A large European lineage the origin of which roughly corresponds to the Northern Italian outbreak early in 2020	1
	B.1.617.2 (Delta)	Predominantly India lineage of concern with several spike mutations	1
	B.1.1.523	Lineage in multiple countries, predominantly Russia	1
"Wave 3" (10 Jun 2021 Onwards)	B.1.617.2 (Delta)	Predominantly India lineage of concern with several spike mutations	50	0	2	4	30	0	50	26	112
	B.1.1.7 (Alpha)	UK lineage of concern, associated with the N501Y mutation	30
	B.1.1	European lineage	2
	B.1	A large European lineage the origin of which roughly corresponds to the Northern Italian outbreak early in 2020	2
	AY.4 (Delta-like)	UK lineage	16
	AY.26 (Delta-like)	USA and Mexico lineage	1
	AY.11 (Delta-like)	UK lineage	1
	B.1.1.448	South African	1
	AY.16 (Delta-like)	lineage in Kenya and multiple other countries	1
	B.1.1.523	Lineage in multiple countries, predominantly Russia	1
	AY.36 (Delta-like)	lineage predominantly in Nigeria, UK and USA	2
	AY.5 (Delta-like)	UK lineage	1
	AY.24 (Delta-like)	predominantly Indonesia lineage	1
	AY.33 (Delta-like)	Lineage circulating mostly in Belgium, Denmark, France, Netherlands, Germany	2
	AY.23 (Delta-like)	predominantly Singapore and Indonesia lineage	1
Total				1	78	107	115	1	51	26	379
*Calculated B as separate to avoid confusion of lineage categorisation.

## Sheet: SupplementaryTableS3
Table S3. Characterization of all SARS-CoV-2 genetic sequences available in the GISAID database as of September 30th, 2021 and used in this study.
Virus name	Accession ID	Collection date	Location	Host	Passage	Specimen	Additional host information	Sequencing technology	Assembly method	Comment	Comment type	Lineage	Clade
hCoV-19/Ukraine/ChVir23535_3/2021	EPI_ISL_1112293	2021-01-11	Europe / Ukraine	Human	Original			Illumina NextSeq	bowtie2			B.1.1.243	GR
hCoV-19/Ukraine/ChVir23535_4/2021	EPI_ISL_1112294	2021-01-11	Europe / Ukraine	Human	Original			Illumina NextSeq	bowtie2			B.1.1.243	GR
hCoV-19/Ukraine/ChVir23535_9/2021	EPI_ISL_1112295	2021-01-17	Europe / Ukraine	Human	Original			Illumina NextSeq	bowtie2	Insertion of 2 nucleotide(s) found at refpos 28251 (frameshift confirmed by the submitter).	info	B.1.1	GR
hCoV-19/Ukraine/ChVir23535_12/2021	EPI_ISL_1112296	2021-01-08	Europe / Ukraine	Human	Original			Illumina NextSeq	bowtie2	Gap of 7 nucleotides when compared to the reference sequence.	info	B.1.1.351	GR
hCoV-19/Ukraine/ChVir23535_17/2021	EPI_ISL_1112297	2021-01-08	Europe / Ukraine	Human	Original			Illumina NextSeq	bowtie2			B.1.1.317	GR
hCoV-19/Ukraine/ChVir23535_18/2021	EPI_ISL_1112298	2021-01-08	Europe / Ukraine	Human	Original			Illumina NextSeq	bowtie2			B.1.1	GR
hCoV-19/Ukraine/ChVir23535_19/2021	EPI_ISL_1112299	2021-01-10	Europe / Ukraine	Human	Original			Illumina NextSeq	bowtie2			B.1.1.236	GR
hCoV-19/Ukraine/ChVir23535_20/2021	EPI_ISL_1112300	2021-01-10	Europe / Ukraine	Human	Original			Illumina NextSeq	bowtie2			B.1.1.236	GR
hCoV-19/Ukraine/ChVir23535_21/2021	EPI_ISL_1112301	2021-01-09	Europe / Ukraine	Human	Original			Illumina NextSeq	bowtie2			B.1.1.243	GR
hCoV-19/Ukraine/ChVir23535_22/2021	EPI_ISL_1112302	2021-01-10	Europe / Ukraine	Human	Original			Illumina NextSeq	bowtie2			B.1.1.351	GR
hCoV-19/Ukraine/ChVir23535_23/2021	EPI_ISL_1112303	2021-01-10	Europe / Ukraine	Human	Original			Illumina NextSeq	bowtie2			B.1.36.8	G
hCoV-19/Ukraine/ChVir23535_25/2021	EPI_ISL_1112304	2021-01-10	Europe / Ukraine	Human	Original			Illumina NextSeq	bowtie2			B.1.1.1	GR
hCoV-19/Ukraine/ChVir23535_26/2021	EPI_ISL_1112305	2021-01-10	Europe / Ukraine	Human	Original			Illumina NextSeq	bowtie2			B.1.1	GR
hCoV-19/Ukraine/ChVir23535_28/2021	EPI_ISL_1112306	2021-01-11	Europe / Ukraine	Human	Original			Illumina NextSeq	bowtie2			B.1.1.1	GR
hCoV-19/Ukraine/ChVir23535_29/2021	EPI_ISL_1112307	2021-01-11	Europe / Ukraine	Human	Original			Illumina NextSeq	bowtie2			B.1.1.243	GR
hCoV-19/Ukraine/ChVir23535_30/2021	EPI_ISL_1112308	2021-01-11	Europe / Ukraine	Human	Original			Illumina NextSeq	bowtie2	Gap of 4 nucleotide(s) found at refpos 26158 (frameshift confirmed by the submitter). NS3 without BLAST coverage.	info	B.1	GV
hCoV-19/Ukraine/ChVir23535_31/2021	EPI_ISL_1112309	2021-01-11	Europe / Ukraine	Human	Original			Illumina NextSeq	bowtie2			B.1	GV
hCoV-19/Ukraine/ChVir23535_34/2021	EPI_ISL_1112310	2021-01-11	Europe / Ukraine	Human	Original			Illumina NextSeq	bowtie2			B.1.1.351	GR
hCoV-19/Ukraine/ChVir23535_35/2021	EPI_ISL_1112311	2021-01-12	Europe / Ukraine	Human	Original			Illumina NextSeq	bowtie2			B.1.131	G
hCoV-19/Ukraine/ChVir23535_42/2021	EPI_ISL_1112312	2021-01-12	Europe / Ukraine	Human	Original			Illumina NextSeq	bowtie2			B.1.1.243	GR
hCoV-19/Ukraine/ChVir23535_51/2021	EPI_ISL_1112313	2021-01-12	Europe / Ukraine	Human	Original			Illumina NextSeq	bowtie2			B.1.1.243	GR
hCoV-19/Ukraine/ChVir23535_53/2021	EPI_ISL_1112314	2021-01-11	Europe / Ukraine	Human	Original			Illumina NextSeq	bowtie2	Gap of 2 nucleotide(s) found at refpos 27792 (frameshift confirmed by the submitter). NS7b without BLAST coverage.	info	B.1.1.243	GR
hCoV-19/Ukraine/ChVir23535_56/2021	EPI_ISL_1112315	2021-01-11	Europe / Ukraine	Human	Original			Illumina NextSeq	bowtie2			B.1.1.294	GR
hCoV-19/Ukraine/ChVir23535_57/2021	EPI_ISL_1112316	2021-01-11	Europe / Ukraine	Human	Original			Illumina NextSeq	bowtie2	Gap of 3 nucleotides when compared to the reference sequence.	info	B.1.1.370	GR
hCoV-19/Ukraine/ChVir23535_58/2021	EPI_ISL_1112317	2021-01-11	Europe / Ukraine	Human	Original			Illumina NextSeq	bowtie2			B.1.1	GR
hCoV-19/Ukraine/ChVir23535_59/2021	EPI_ISL_1112318	2021-01-11	Europe / Ukraine	Human	Original			Illumina NextSeq	bowtie2			B.1.1.294	GR
hCoV-19/Ukraine/ChVir23535_60/2021	EPI_ISL_1112319	2021-01-11	Europe / Ukraine	Human	Original			Illumina NextSeq	bowtie2			B.1.1.159	GR
hCoV-19/Ukraine/ChVir23535_61/2021	EPI_ISL_1112320	2021-01-11	Europe / Ukraine	Human	Original			Illumina NextSeq	bowtie2			B.1.1.317	GR
hCoV-19/Ukraine/ChVir23535_62/2021	EPI_ISL_1112321	2021-01-11	Europe / Ukraine	Human	Original			Illumina NextSeq	bowtie2			B.1.1	GR
hCoV-19/Ukraine/ChVir23535_63/2021	EPI_ISL_1112322	2021-01-11	Europe / Ukraine	Human	Original			Illumina NextSeq	bowtie2			B.1.1.159	GR
hCoV-19/Ukraine/ChVir23535_64/2021	EPI_ISL_1112323	2021-01-11	Europe / Ukraine	Human	Original			Illumina NextSeq	bowtie2			B.1.1.351	GR
hCoV-19/Ukraine/ChVir23535_65/2021	EPI_ISL_1112324	2021-01-11	Europe / Ukraine	Human	Original			Illumina NextSeq	bowtie2	Gap of 8 nucleotide(s) found at refpos 27279 (frameshift confirmed by the submitter). NS6 without BLAST coverage.	info	B.1.422	GV
hCoV-19/Ukraine/ChVir23535_66/2021	EPI_ISL_1112325	2021-01-05	Europe / Ukraine	Human	Original			Illumina NextSeq	bowtie2			B.1.1.159	GR
hCoV-19/Ukraine/ChVir23535_67/2021	EPI_ISL_1112326	2021-01-05	Europe / Ukraine	Human	Original			Illumina NextSeq	bowtie2			B.1.1.159	GR
hCoV-19/Ukraine/ChVir23535_68/2021	EPI_ISL_1112327	2021-01-05	Europe / Ukraine	Human	Original			Illumina NextSeq	bowtie2	Gap of 8 nucleotide(s) found at refpos 27793 (frameshift confirmed by the submitter).	info	B.1.1.159	GR
hCoV-19/Ukraine/ChVir23535_70/2021	EPI_ISL_1112328	2021-01-05	Europe / Ukraine	Human	Original			Illumina NextSeq	bowtie2			B.1.1.39	GR
hCoV-19/Ukraine/ChVir23535_71/2021	EPI_ISL_1112329	2021-01-05	Europe / Ukraine	Human	Original			Illumina NextSeq	bowtie2	Gap of 8 nucleotide(s) found at refpos 27793 (frameshift confirmed by the submitter).	info	B.1.1.159	GR
hCoV-19/Ukraine/ChVir23535_72/2021	EPI_ISL_1112330	2021-01-05	Europe / Ukraine	Human	Original			Illumina NextSeq	bowtie2			B.1.527	G
hCoV-19/Ukraine/ChVir23535_76/2021	EPI_ISL_1112331	2021-01-09	Europe / Ukraine	Human	Original			Illumina NextSeq	bowtie2			B.1.1	GR
hCoV-19/Ukraine/ChVir23535_77/2021	EPI_ISL_1112332	2021-01-09	Europe / Ukraine	Human	Original			Illumina NextSeq	bowtie2			B.1.1.243	GR
hCoV-19/Ukraine/ChVir23535_78/2021	EPI_ISL_1112333	2021-01-09	Europe / Ukraine	Human	Original			Illumina NextSeq	bowtie2			B.1.1.39	GR
hCoV-19/Ukraine/ChVir23535_79/2021	EPI_ISL_1112334	2021-01-09	Europe / Ukraine	Human	Original			Illumina NextSeq	bowtie2			B.1.1.243	GR
hCoV-19/Ukraine/ChVir23535_80/2021	EPI_ISL_1112335	2021-01-10	Europe / Ukraine	Human	Original			Illumina NextSeq	bowtie2			B.1	G
hCoV-19/Ukraine/ChVir23535_91/2021	EPI_ISL_1112336	2021-01-05	Europe / Ukraine	Human	Original			Illumina NextSeq	bowtie2			B.1.1.351	GR
hCoV-19/Ukraine/ChVir23535_94/2021	EPI_ISL_1112337	2021-01-05	Europe / Ukraine	Human	Original			Illumina NextSeq	bowtie2			B.1.1.351	GR
hCoV-19/Ukraine/ChVir23535_99/2021	EPI_ISL_1112338	2021-01-05	Europe / Ukraine	Human	Original			Illumina NextSeq	bowtie2			B.1.1	GR
hCoV-19/Ukraine/ChVir23535_109/2021	EPI_ISL_1112339	2021-01-11	Europe / Ukraine	Human	Original			Illumina NextSeq	bowtie2			B.1.1.351	GR
hCoV-19/Ukraine/ChVir23535_100/2020	EPI_ISL_1112753	2020-12-28	Europe / Ukraine	Human	Original			NextSeq	Bowtie2			B.1.1.351	GR
hCoV-19/Ukraine/Ivano-Frankivsk-1431/2021	EPI_ISL_1121990	2021-02-18	Europe / Ukraine / Ivano-Frankivsk	Human	Original	Nasopharyngeal swab		Illumina iSeq	Dragen	Stretches of NNNs (3.81% of overall sequence). NS8_Q27stop results in 78.5% truncation of the protein sequence. Gap of 19 nucleotides when compared to the reference sequence.	warn	B.1.1.7	GRY
hCoV-19/Ukraine/Ivano-Frankivsk-1452/2021	EPI_ISL_1121991	2021-02-19	Europe / Ukraine / Ivano-Frankivsk	Human	Original	Nasopharyngeal swab		Illumina iSeq	Dragen	Long stretches of NNNs (12.23% of overall sequence). NS8_Q27stop results in 78.5% truncation of the protein sequence. Gap of 19 nucleotides when compared to the reference sequence. NSP11 without BLAST coverage. E without BLAST coverage.	alert	B.1.1.7	GRY
hCoV-19/Ukraine/Ivano-Frankivsk-4/2020	EPI_ISL_1121992	2020-05-22	Europe / Ukraine / Ivano-Frankivsk	Human	Original	Nasopharyngeal swab		Illumina iSeq	Dragen	Stretches of NNNs (4.95% of overall sequence).	warn	B.1.1	GR
hCoV-19/Ukraine/Lviv-857/2020	EPI_ISL_1122014	2020-08-06	Europe / Ukraine / Lviv	Human	Original	Nasopharyngeal swab		Illumina iSeq	Dragen	Stretches of NNNs (1.26% of overall sequence).	warn	B.1.1	GR
hCoV-19/Ukraine/MN908947-1-142627-p/2021	EPI_ISL_1298474	2021-02-22	Europe / Ukraine / Ivano-Frankivsk	Human	Original	Oropharyngeal swab		Ion Torrent		NS8_Q27stop results in 78.5% truncation of the protein sequence. Gap of 18 nucleotides when compared to the reference sequence.	info	B.1.1.7	GRY
hCoV-19/Ukraine/MN908947-2-142695-p/2021	EPI_ISL_1298475	2021-02-22	Europe / Ukraine / Ivano-Frankivsk	Human	Original	Oropharyngeal swab		Ion Torrent		NS8_K68stop results in 44.6% truncation of the protein sequence. NS8_Q27stop results in 78.5% truncation of the protein sequence. Gap of 18 nucleotides when compared to the reference sequence.	info	B.1.1.7	GRY
hCoV-19/Ukraine/MN908947-6-142658-p/2021	EPI_ISL_1298476	2021-02-22	Europe / Ukraine / Ivano-Frankivsk	Human	Original	Oropharyngeal swab		Ion Torrent		NS8_K68stop results in 44.6% truncation of the protein sequence. NS8_Q27stop results in 78.5% truncation of the protein sequence. Gap of 19 nucleotides when compared to the reference sequence.	info	B.1.1.7	GRY
hCoV-19/Ukraine/MN908947-10-142662/2021	EPI_ISL_1298477	2021-02-22	Europe / Ukraine / Ivano-Frankivsk	Human	Original	Oropharyngeal swab		Ion Torrent		NS8_K68stop results in 44.6% truncation of the protein sequence. NS8_Q27stop results in 78.5% truncation of the protein sequence. Gap of 18 nucleotides when compared to the reference sequence.	info	B.1.1.7	GRY
hCoV-19/Ukraine/MN908947-11-142690/2021	EPI_ISL_1298478	2021-02-22	Europe / Ukraine / Ivano-Frankivsk	Human	Original	Oropharyngeal swab		Ion Torrent		NS8_K68stop results in 44.6% truncation of the protein sequence. NS8_Q27stop results in 78.5% truncation of the protein sequence. Gap of 18 nucleotides when compared to the reference sequence.	info	B.1.1.7	GRY
hCoV-19/Ukraine/MN908947-12-142692/2021	EPI_ISL_1298479	2021-02-22	Europe / Ukraine / Ivano-Frankivsk	Human	Original	Oropharyngeal swab		Ion Torrent		NS8_K68stop results in 44.6% truncation of the protein sequence. NS8_Q27stop results in 78.5% truncation of the protein sequence. Gap of 18 nucleotides when compared to the reference sequence.	info	B.1.1.7	GRY
hCoV-19/Ukraine/MN908947-13-142706/2021	EPI_ISL_1298480	2021-02-22	Europe / Ukraine / Ivano-Frankivsk	Human	Original	Oropharyngeal swab		Ion Torrent		NS8_Q27stop results in 78.5% truncation of the protein sequence. Gap of 18 nucleotides when compared to the reference sequence.	info	B.1.1.7	GRY
hCoV-19/Ukraine/MN908947-7-142660/2021	EPI_ISL_1298481	2021-02-22	Europe / Ukraine / Ivano-Frankivsk	Human	Original	Oropharyngeal swab		Ion Torrent		NS8_Q27stop results in 78.5% truncation of the protein sequence. Gap of 18 nucleotides when compared to the reference sequence.	info	B.1.1.7	GRY
hCoV-19/Ukraine/MN908947-4-142638/2021	EPI_ISL_1298482	2021-02-22	Europe / Ukraine / Ivano-Frankivsk	Human	Original	Oropharyngeal swab		Ion Torrent		NS8_Q27stop results in 78.5% truncation of the protein sequence. Gap of 18 nucleotides when compared to the reference sequence.	info	B.1.1.7	GRY
hCoV-19/Ukraine/MN908947-17-142670/2021	EPI_ISL_1298483	2021-02-22	Europe / Ukraine / Ivano-Frankivsk	Human	Original	Oropharyngeal swab		Ion Torrent		NS8_K68stop results in 44.6% truncation of the protein sequence. NS8_Q27stop results in 78.5% truncation of the protein sequence. Gap of 18 nucleotides when compared to the reference sequence.	info	B.1.1.7	GRY
hCoV-19/Ukraine/MN908947-15-142701/2021	EPI_ISL_1298484	2021-02-22	Europe / Ukraine / Ivano-Frankivsk	Human	Original	Oropharyngeal swab		Ion Torrent		NS8_Q27stop results in 78.5% truncation of the protein sequence. Gap of 18 nucleotides when compared to the reference sequence.	info	B.1.1.7	GRY
hCoV-19/Ukraine/MN908947-14-142697/2021	EPI_ISL_1298485	2021-02-22	Europe / Ukraine / Ivano-Frankivsk	Human	Original	Oropharyngeal swab		Ion Torrent		NS8_K68stop results in 44.6% truncation of the protein sequence. NS8_Q27stop results in 78.5% truncation of the protein sequence. Gap of 18 nucleotides when compared to the reference sequence.	info	B.1.1.7	GRY
hCoV-19/Ukraine/MN908947-13-142689/2021	EPI_ISL_1298486	2021-02-22	Europe / Ukraine / Ivano-Frankivsk	Human	Original	Oropharyngeal swab		Ion Torrent		NS8_Q27stop results in 78.5% truncation of the protein sequence. NS8_E106stop results in 13.2% truncation of the protein sequence. Gap of 19 nucleotides when compared to the reference sequence.	info	B.1.1.7	GRY
hCoV-19/Ukraine/MN908947-12-142683/2021	EPI_ISL_1298487	2021-02-22	Europe / Ukraine / Ivano-Frankivsk	Human	Original	Oropharyngeal swab		Ion Torrent		NS8_K68stop results in 44.6% truncation of the protein sequence. NS8_Q27stop results in 78.5% truncation of the protein sequence. Gap of 19 nucleotides when compared to the reference sequence.	info	B.1.1.7	GRY
hCoV-19/Ukraine/MN908947-10-142672/2021	EPI_ISL_1298488	2021-02-22	Europe / Ukraine / Ivano-Frankivsk	Human	Original	Oropharyngeal swab		Ion Torrent		NS8_Q27stop results in 78.5% truncation of the protein sequence. Gap of 18 nucleotides when compared to the reference sequence.	info	B.1.1.7	GRY
hCoV-19/Ukraine/Dnipro-35/2021	EPI_ISL_1315427	2021-02-18	Europe / Ukraine / Dnipro	Human	Original	Nasopharyngeal swab		Illumina iSeq100	Dragen	Stretches of NNNs (4.88% of overall sequence). NS8_Q27stop results in 78.5% truncation of the protein sequence. Gap of 19 nucleotides when compared to the reference sequence. E without BLAST coverage.	warn	B.1.1.7	GRY
hCoV-19/Ukraine/Kyiv-571/2021	EPI_ISL_1315475	2021-03-10	Europe / Ukraine / Kyiv	Human	Original	Nasopharyngeal swab		Illumina iSeq100	Dragen	Long stretches of NNNs (19.59% of overall sequence). NS8_Q27stop results in 78.5% truncation of the protein sequence. Gap of 19 nucleotides when compared to the reference sequence. NSP11 without BLAST coverage. E without BLAST coverage.	alert	B.1.1.7	GRY
hCoV-19/Ukraine/Kharkiv-575/2021	EPI_ISL_1315476	2021-03-11	Europe / Ukraine / Kharkiv	Human	Original	Nasopharyngeal swab		Illumina iSeq100	Dragen	Long stretches of NNNs (36.84% of overall sequence). NS8_Q27stop results in 78.5% truncation of the protein sequence. Gap of 19 nucleotides when compared to the reference sequence. NSP11 without BLAST coverage. NSP10 without BLAST coverage. NSP9 without BLAST coverage. E without BLAST coverage.	alert	None	GRY
hCoV-19/Ukraine/Lviv-1478/2021	EPI_ISL_1315477	2021-02-24	Europe / Ukraine / Lviv	Human	Original	Nasopharyngeal swab		Illumina iSeq100	Dragen	Long stretches of NNNs (38.93% of overall sequence). NS8_Q27stop results in 78.5% truncation of the protein sequence. Gap of 19 nucleotides when compared to the reference sequence. NSP11 without BLAST coverage. NSP10 without BLAST coverage. NSP13 without BLAST coverage. NSP9 without BLAST coverage. E without BLAST coverage.	alert	None	GRY
hCoV-19/Ukraine/Ivano-Frankivsk-1430/2021	EPI_ISL_1315478	2021-02-18	Europe / Ukraine / Ivano-Frankivsk	Human	Original	Nasopharyngeal swab		Illumina iSeq100	Dragen	Long stretches of NNNs (35.92% of overall sequence). NS8_Q27stop results in 78.5% truncation of the protein sequence. Gap of 19 nucleotides when compared to the reference sequence. NSP11 without BLAST coverage. NSP10 without BLAST coverage. NSP9 without BLAST coverage. E without BLAST coverage.	alert	None	GRY
hCoV-19/Ukraine/Kyiv-PHC-0001/2021	EPI_ISL_1495111	2021-02-25	Europe / Ukraine / Kyiv	Human	Original			Nanopore MinION, Amplicon		NS8_Q27stop results in 78.5% truncation of the protein sequence. Gap of 19 nucleotides when compared to the reference sequence.	info	B.1.1.7	GRY
hCoV-19/Ukraine/Kyiv-PHC-0002/2021	EPI_ISL_1495112	2021-03-09	Europe / Ukraine / Kyiv	Human	Original			Nanopore MinION, Amplicon		NS8_K68stop results in 44.6% truncation of the protein sequence. NS8_Q27stop results in 78.5% truncation of the protein sequence. Gap of 19 nucleotides when compared to the reference sequence.	info	B.1.1.7	GRY
hCoV-19/Ukraine/Kyiv-PHC-0003/2021	EPI_ISL_1495113	2021-03-16	Europe / Ukraine / Kyiv	Human	Original			Nanopore MinION, Amplicon		NS8_Q27stop results in 78.5% truncation of the protein sequence. Gap of 19 nucleotides when compared to the reference sequence.	info	B.1.1.7	GRY
hCoV-19/Ukraine/Kyiv-PHC-0004/2021	EPI_ISL_1495114	2021-03-16	Europe / Ukraine / Kyiv	Human	Original			Nanopore MinION, Amplicon		NS8_Q27stop results in 78.5% truncation of the protein sequence. Gap of 21 nucleotides when compared to the reference sequence.	info	B.1.1.7	GRY
hCoV-19/Ukraine/Kyiv-PHC-0005/2021	EPI_ISL_1495115	2021-03-16	Europe / Ukraine / Kyiv	Human	Original			Nanopore MinION, Amplicon		NS8_Q27stop results in 78.5% truncation of the protein sequence. Gap of 19 nucleotides when compared to the reference sequence.	info	B.1.1.7	GRY
hCoV-19/Ukraine/Kyiv-PHC-0006/2021	EPI_ISL_1495116	2021-03-16	Europe / Ukraine / Kyiv	Human	Original			Nanopore MinION, Amplicon		NS8_Q27stop results in 78.5% truncation of the protein sequence. Gap of 19 nucleotides when compared to the reference sequence.	info	B.1.1.7	GRY
hCoV-19/Ukraine/Kyiv-PHC-0007/2021	EPI_ISL_1495117	2021-03-16	Europe / Ukraine / Kyiv	Human	Original			Nanopore MinION, Amplicon		NS8_K68stop results in 44.6% truncation of the protein sequence. NS8_Q27stop results in 78.5% truncation of the protein sequence. Gap of 19 nucleotides when compared to the reference sequence.	info	B.1.1.7	GRY
hCoV-19/Ukraine/Kyiv-PHC-0008/2021	EPI_ISL_1495118	2021-03-16	Europe / Ukraine / Kyiv	Human	Original			Nanopore MinION, Amplicon		NS7a_Q62stop results in 49.6% truncation of the protein sequence. NS8_Q27stop results in 78.5% truncation of the protein sequence. Gap of 19 nucleotides when compared to the reference sequence.	info	B.1.1.7	GRY
hCoV-19/Ukraine/Kyiv-PHC-0009/2021	EPI_ISL_1495119	2021-03-16	Europe / Ukraine / Kyiv	Human	Original			Nanopore MinION, Amplicon		NS7a_Q62stop results in 49.6% truncation of the protein sequence. NS8_Q27stop results in 78.5% truncation of the protein sequence. Gap of 19 nucleotides when compared to the reference sequence.	info	B.1.1.7	GRY
hCoV-19/Ukraine/Kyiv-PHC-0010/2021	EPI_ISL_1495120	2021-03-16	Europe / Ukraine / Kyiv	Human	Original			Nanopore MinION, Amplicon		NS8_K68stop results in 44.6% truncation of the protein sequence. NS8_Q27stop results in 78.5% truncation of the protein sequence. Gap of 19 nucleotides when compared to the reference sequence.	info	B.1.1.7	GRY
hCoV-19/Ukraine/Kyiv-PHC-0011/2021	EPI_ISL_1495121	2021-03-16	Europe / Ukraine / Kyiv	Human	Original			Nanopore MinION, Amplicon		NS8_K68stop results in 44.6% truncation of the protein sequence. NS8_Q27stop results in 78.5% truncation of the protein sequence. Gap of 19 nucleotides when compared to the reference sequence.	info	B.1.1.7	GRY
hCoV-19/Ukraine/Kyiv-PHC-0012/2021	EPI_ISL_1495122	2021-03-16	Europe / Ukraine / Kyiv	Human	Original			Nanopore MinION, Amplicon		NS8_Q27stop results in 78.5% truncation of the protein sequence. Gap of 19 nucleotides when compared to the reference sequence.	info	B.1.1.7	GRY
hCoV-19/Ukraine/Kyiv-PHC-0013/2021	EPI_ISL_1495123	2021-03-16	Europe / Ukraine / Kyiv	Human	Original			Nanopore MinION, Amplicon		NS8_K68stop results in 44.6% truncation of the protein sequence. NS8_Q27stop results in 78.5% truncation of the protein sequence. Gap of 19 nucleotides when compared to the reference sequence.	info	B.1.1.7	GRY
hCoV-19/Ukraine/Kyiv-PHC-0014/2021	EPI_ISL_1495124	2021-03-16	Europe / Ukraine / Kyiv	Human	Original			Nanopore MinION, Amplicon		NS8_Q27stop results in 78.5% truncation of the protein sequence. Gap of 19 nucleotides when compared to the reference sequence.	info	B.1.1.7	GRY
hCoV-19/Ukraine/Kyiv-PHC-0015/2021	EPI_ISL_1495125	2021-03-16	Europe / Ukraine / Kyiv	Human	Original			Nanopore MinION, Amplicon		NS8_Q27stop results in 78.5% truncation of the protein sequence. Gap of 19 nucleotides when compared to the reference sequence.	info	B.1.1.7	GRY
hCoV-19/Ukraine/Kyiv-PHC-0016/2021	EPI_ISL_1495126	2021-03-16	Europe / Ukraine / Kyiv	Human	Original			Nanopore MinION, Amplicon		NS8_K68stop results in 44.6% truncation of the protein sequence. NS8_Q27stop results in 78.5% truncation of the protein sequence. Gap of 19 nucleotides when compared to the reference sequence.	info	B.1.1.7	GRY
hCoV-19/Ukraine/Kyiv-PHC-0017/2021	EPI_ISL_1495127	2021-03-16	Europe / Ukraine / Kyiv	Human	Original			Nanopore MinION, Amplicon		Stretches of NNNs (1.11% of overall sequence). NS8_Q27stop results in 78.5% truncation of the protein sequence. Gap of 19 nucleotides when compared to the reference sequence.	warn	B.1.1.7	GRY
hCoV-19/Ukraine/Kyiv-PHC-0018/2021	EPI_ISL_1495128	2021-03-16	Europe / Ukraine / Kyiv	Human	Original			Nanopore MinION, Amplicon		NS8_K68stop results in 44.6% truncation of the protein sequence. NS8_Q27stop results in 78.5% truncation of the protein sequence. Gap of 19 nucleotides when compared to the reference sequence.	info	B.1.1.7	GRY
hCoV-19/Ukraine/Kyiv-PHC-0019/2021	EPI_ISL_1495129	2021-03-16	Europe / Ukraine / Kyiv	Human	Original			Nanopore MinION, Amplicon		NS8_K68stop results in 44.6% truncation of the protein sequence. NS8_Q27stop results in 78.5% truncation of the protein sequence. Gap of 19 nucleotides when compared to the reference sequence.	info	B.1.1.7	GRY
hCoV-19/Ukraine/Kyiv-PHC-0020/2021	EPI_ISL_1495130	2021-03-16	Europe / Ukraine / Kyiv	Human	Original			Nanopore MinION, Amplicon		NS8_Q27stop results in 78.5% truncation of the protein sequence. Gap of 19 nucleotides when compared to the reference sequence.	info	B.1.1.7	GRY
hCoV-19/Ukraine/Kyiv-PHC-0022/2021	EPI_ISL_1495131	2021-03-16	Europe / Ukraine / Kyiv	Human	Original			Nanopore MinION, Amplicon		NS8_K68stop results in 44.6% truncation of the protein sequence. NS8_Q27stop results in 78.5% truncation of the protein sequence. Gap of 19 nucleotides when compared to the reference sequence.	info	B.1.1.7	GRY
hCoV-19/Ukraine/Kyiv-PHC-0023/2021	EPI_ISL_1495132	2021-03-17	Europe / Ukraine / Kyiv	Human	Original			Nanopore MinION, Amplicon		NS8_K68stop results in 44.6% truncation of the protein sequence. NS8_Q27stop results in 78.5% truncation of the protein sequence. Gap of 19 nucleotides when compared to the reference sequence.	info	B.1.1.7	GRY
hCoV-19/Ukraine/Kyiv-PHC-0024/2021	EPI_ISL_1495133	2021-03-17	Europe / Ukraine / Kyiv	Human	Original			Nanopore MinION, Amplicon		NS8_K68stop results in 44.6% truncation of the protein sequence. NS8_Q27stop results in 78.5% truncation of the protein sequence. Gap of 19 nucleotides when compared to the reference sequence.	info	B.1.1.7	GRY
hCoV-19/Ukraine/Kyiv-PHC-0025/2021	EPI_ISL_1495134	2021-03-17	Europe / Ukraine / Kyiv	Human	Original			Nanopore MinION, Amplicon		NS8_K68stop results in 44.6% truncation of the protein sequence. NS8_Q27stop results in 78.5% truncation of the protein sequence. Gap of 19 nucleotides when compared to the reference sequence.	info	B.1.1.7	GRY
hCoV-19/Ukraine/Kyiv-PHC-0026/2021	EPI_ISL_1495135	2021-03-17	Europe / Ukraine / Kyiv	Human	Original			Nanopore MinION, Amplicon		NS7a_Q62stop results in 49.6% truncation of the protein sequence. NS8_Q27stop results in 78.5% truncation of the protein sequence. Gap of 19 nucleotides when compared to the reference sequence.	info	B.1.1.7	GRY
hCoV-19/Ukraine/Kyiv-PHC-0028/2021	EPI_ISL_1495136	2021-03-17	Europe / Ukraine / Kyiv	Human	Original			Nanopore MinION, Amplicon		NSP2_Q427stop results in 33.2% truncation of the protein sequence. NS7a_Q62stop results in 49.6% truncation of the protein sequence. NS8_Q27stop results in 78.5% truncation of the protein sequence. Gap of 16 nucleotides when compared to the reference sequence.	info	B.1.1.7	GR
hCoV-19/Ukraine/Kyiv-PHC-0029/2021	EPI_ISL_1495137	2021-03-17	Europe / Ukraine / Kyiv	Human	Original			Nanopore MinION, Amplicon		NS8_K68stop results in 44.6% truncation of the protein sequence. NS8_Q27stop results in 78.5% truncation of the protein sequence. Gap of 19 nucleotides when compared to the reference sequence.	info	B.1.1.7	GRY
hCoV-19/Ukraine/Kyiv-PHC-0030/2021	EPI_ISL_1495138	2021-03-18	Europe / Ukraine / Kyiv	Human	Original			Nanopore MinION, Amplicon		NS8_Q27stop results in 78.5% truncation of the protein sequence. Gap of 19 nucleotides when compared to the reference sequence.	info	B.1.1.7	GRY
hCoV-19/Ukraine/Kyiv-PHC-0031/2021	EPI_ISL_1495139	2021-03-18	Europe / Ukraine / Kyiv	Human	Original			Nanopore MinION, Amplicon		NS8_K68stop results in 44.6% truncation of the protein sequence. NS8_Q27stop results in 78.5% truncation of the protein sequence. Gap of 19 nucleotides when compared to the reference sequence.	info	B.1.1.7	GRY
hCoV-19/Ukraine/Kyiv-PHC-0032/2021	EPI_ISL_1495140	2021-03-18	Europe / Ukraine / Kyiv	Human	Original			Nanopore MinION, Amplicon		NS8_K68stop results in 44.6% truncation of the protein sequence. NS8_Q27stop results in 78.5% truncation of the protein sequence. Gap of 19 nucleotides when compared to the reference sequence.	info	B.1.1.7	GRY
hCoV-19/Ukraine/Kyiv-PHC-0033/2021	EPI_ISL_1495141	2021-03-18	Europe / Ukraine / Kyiv	Human	Original			Nanopore MinION, Amplicon		NS8_K68stop results in 44.6% truncation of the protein sequence. NS8_Q27stop results in 78.5% truncation of the protein sequence. Gap of 19 nucleotides when compared to the reference sequence.	info	B.1.1.7	GRY
hCoV-19/Ukraine/Kyiv-PHC-0034/2021	EPI_ISL_1495142	2021-03-18	Europe / Ukraine / Kyiv	Human	Original			Nanopore MinION, Amplicon		NS8_Q27stop results in 78.5% truncation of the protein sequence. Gap of 19 nucleotides when compared to the reference sequence.	info	B.1.1.7	GRY
hCoV-19/Ukraine/Kyiv-PHC-0035/2021	EPI_ISL_1495143	2021-03-18	Europe / Ukraine / Kyiv	Human	Original			Nanopore MinION, Amplicon		NS8_K68stop results in 44.6% truncation of the protein sequence. NS8_Q27stop results in 78.5% truncation of the protein sequence. Gap of 19 nucleotides when compared to the reference sequence.	info	B.1.1.7	GRY
hCoV-19/Ukraine/HZ8-62574/2021	EPI_ISL_2934569	2021-06-24	Europe / Ukraine / Uzhorod	Human	Original			Ion Torrent		Gap of 13 nucleotides when compared to the reference sequence.	info	B.1.617.2	GK
hCoV-19/Ukraine/HZ2-59758/2021	EPI_ISL_2934570	2021-05-21	Europe / Ukraine / Kherson	Human	Original			Ion Torrent		NSP6_L237stop results in 18.6% truncation of the protein sequence. NS8_K68stop results in 44.6% truncation of the protein sequence. NS8_Q27stop results in 78.5% truncation of the protein sequence. Gap of 88 nucleotides when compared to the reference sequence. %UniqueMutations 0.19%.	warn	B.1.1.7	GRY
hCoV-19/Ukraine/F6-104/2021	EPI_ISL_2934571	2021-06-14	Europe / Ukraine / Kyiv	Human	Original			Ion Torrent		NS8_K68stop results in 44.6% truncation of the protein sequence. NS8_Q27stop results in 78.5% truncation of the protein sequence. Gap of 18 nucleotides when compared to the reference sequence.	info	B.1.1.7	GRY
hCoV-19/Ukraine/F1-3/2021	EPI_ISL_2934572	2021-06-14	Europe / Ukraine / Kyiv	Human	Original			Ion Torrent		NS8_K68stop results in 44.6% truncation of the protein sequence. NS8_Q27stop results in 78.5% truncation of the protein sequence. Gap of 18 nucleotides when compared to the reference sequence.	info	B.1.1.7	GRY
hCoV-19/Ukraine/HZ4-60454/2021	EPI_ISL_2934573	2021-05-25	Europe / Ukraine / Sumy	Human	Original			Ion Torrent		NS8_Q27stop results in 78.5% truncation of the protein sequence. Gap of 18 nucleotides when compared to the reference sequence.	info	B.1.1.7	GRY
hCoV-19/Ukraine/G1-00/2021	EPI_ISL_2934574	2021-06-18	Europe / Ukraine / Kyiv	Human	Original			Ion Torrent		Gap of 13 nucleotides when compared to the reference sequence.	info	B.1.617.2	GK
hCoV-19/Ukraine/F10-234/2021	EPI_ISL_2934575	2021-06-15	Europe / Ukraine / Kyiv	Human	Original			Ion Torrent		NSP6_C197stop results in 32.4% truncation of the protein sequence. NS8_K68stop results in 44.6% truncation of the protein sequence. NS8_Q27stop results in 78.5% truncation of the protein sequence. Gap of 135 nucleotides when compared to the reference sequence. %UniqueMutations 0.22%.	warn	B.1.1.7	GRY
hCoV-19/Ukraine/Kyiv-F2-6/2021	EPI_ISL_2966511	2021-06-15	Europe / Ukraine / Kyiv	Human	Original			Ion Torrent		Insertion of 1 nucleotide(s) found at refpos 28220 (FRAMESHIFT CONFIRMED BY THE SUBMITTER). NS8_K68stop results in 44.6% truncation of the protein sequence. NS8_Q27stop results in 78.5% truncation of the protein sequence. Gap of 18 nucleotides when compared to the reference sequence.	info	B.1.1.7	GRY
hCoV-19/Ukraine/Uzhorod-HZ7-62573/2021	EPI_ISL_2966512	2021-06-24	Europe / Ukraine / Uzhorod	Human	Original			Ion Torrent		Gap of 13 nucleotides when compared to the reference sequence.	info	B.1.617.2	GK
hCoV-19/Ukraine/Kyiv-F5-14/2021	EPI_ISL_2966513	2021-06-15	Europe / Ukraine / Kyiv	Human	Original			Ion Torrent		Gap of 80 nucleotide(s) found at refpos 27683 (FRAMESHIFT CONFIRMED BY THE SUBMITTER). NS7a_ins96stopLSLIDFYLC results in 21.5% truncation of the protein sequence. NS8_Q27stop results in 78.5% truncation of the protein sequence. Gap of 99 nucleotides when compared to the reference sequence. %UniqueMutations 0.06%.	info	B.1.1.7	GRY
hCoV-19/Ukraine/UA-RIVM-21903/2020	EPI_ISL_3253254	2020-12-30	Europe / Ukraine / Ukraine	Human	Original			Nanopore MinION		Stretches of NNNs (1.78% of overall sequence). E without BLAST coverage.	warn	B.1	G
hCoV-19/Ukraine/UA-RIVM-21883/2020	EPI_ISL_3253255	2020-12-30	Europe / Ukraine / Ukraine	Human	Original			Nanopore MinION		NSP3_E1136stop results in 41.6% truncation of the protein sequence. E without BLAST coverage.	warn	B.1.131	G
hCoV-19/Ukraine/UA-RIVM-21885/2020	EPI_ISL_3253256	2020-12-29	Europe / Ukraine / Ukraine	Human	Original			Nanopore MinION		NS7a_L31stop results in 75.2% truncation of the protein sequence.	info	B.1.127	G
hCoV-19/Ukraine/UA-RIVM-21892/2020	EPI_ISL_3253257	2020-12-29	Europe / Ukraine / Ukraine	Human	Original			Nanopore MinION		Gap of 6 nucleotides when compared to the reference sequence.	info	B.1.258	G
hCoV-19/Ukraine/UA-RIVM-21912/2020	EPI_ISL_3253258	2020-12-29	Europe / Ukraine / Ukraine	Human	Original			Nanopore MinION		Gap of 18 nucleotides when compared to the reference sequence.	info	B.1.1.159	GR
hCoV-19/Ukraine/UA-RIVM-21879/2020	EPI_ISL_3253259	2020-12-29	Europe / Ukraine / Ukraine	Human	Original			Nanopore MinION		Gap of 12 nucleotides when compared to the reference sequence.	info	B.1.1.159	GR
hCoV-19/Ukraine/UA-RIVM-21880/2020	EPI_ISL_3253260	2020-12-31	Europe / Ukraine / Ukraine	Human	Original			Nanopore MinION		E without BLAST coverage.	warn	B.1.160	G
hCoV-19/Ukraine/UA-RIVM-21888/2020	EPI_ISL_3253261	2020-12-29	Europe / Ukraine / Ukraine	Human	Original			Nanopore MinION		E without BLAST coverage.	warn	B.1.131	G
hCoV-19/Ukraine/UA-RIVM-21896/2020	EPI_ISL_3253262	2020-12-30	Europe / Ukraine / Ukraine	Human	Original			Nanopore MinION		E without BLAST coverage.	warn	B.1.1	GR
hCoV-19/Ukraine/UA-RIVM-21905/2020	EPI_ISL_3253263	2020-12-31	Europe / Ukraine / Ukraine	Human	Original			Nanopore MinION		E without BLAST coverage.	warn	B.1	G
hCoV-19/Ukraine/UA-RIVM-21913/2020	EPI_ISL_3253264	2020-12-29	Europe / Ukraine / Ukraine	Human	Original			Nanopore MinION		E without BLAST coverage.	warn	B.1	G
hCoV-19/Ukraine/UA-RIVM-46426/2021	EPI_ISL_3253265	2021-01-04	Europe / Ukraine / Ukraine	Human	Original			Nanopore MinION		E without BLAST coverage.	warn	Q.8	G
hCoV-19/Ukraine/UA-RIVM-21878/2020	EPI_ISL_3253266	2020-12-29	Europe / Ukraine / Ukraine	Human	Original			Nanopore MinION				B.1.243	G
hCoV-19/Ukraine/UA-RIVM-21881/2020	EPI_ISL_3253267	2020-12-30	Europe / Ukraine / Ukraine	Human	Original			Nanopore MinION				B.1	G
hCoV-19/Ukraine/UA-RIVM-21882/2020	EPI_ISL_3253268	2020-12-31	Europe / Ukraine / Ukraine	Human	Original			Nanopore MinION				B.1.221	G
hCoV-19/Ukraine/UA-RIVM-21884/2020	EPI_ISL_3253269	2020-12-30	Europe / Ukraine / Ukraine	Human	Original			Nanopore MinION				B.1.1	GR
hCoV-19/Ukraine/UA-RIVM-46420/2021	EPI_ISL_3253270	2021-01-05	Europe / Ukraine / Ukraine	Human	Original			Nanopore MinION				B.1.1.159	GR
hCoV-19/Ukraine/UA-RIVM-21886/2020	EPI_ISL_3253271	2020-12-30	Europe / Ukraine / Ukraine	Human	Original			Nanopore MinION				B.1	GV
hCoV-19/Ukraine/UA-RIVM-21887/2020	EPI_ISL_3253272	2020-12-30	Europe / Ukraine / Ukraine	Human	Original			Nanopore MinION				B.1.131	G
hCoV-19/Ukraine/UA-RIVM-21889/2020	EPI_ISL_3253273	2020-12-29	Europe / Ukraine / Ukraine	Human	Original			Nanopore MinION				B.1.1.159	GR
hCoV-19/Ukraine/UA-RIVM-46421/2021	EPI_ISL_3253274	2021-01-02	Europe / Ukraine / Ukraine	Human	Original			Nanopore MinION				B.1	G
hCoV-19/Ukraine/UA-RIVM-46422/2021	EPI_ISL_3253275	2021-01-05	Europe / Ukraine / Ukraine	Human	Original			Nanopore MinION				B.1.1.159	GR
hCoV-19/Ukraine/UA-RIVM-21890/2020	EPI_ISL_3253276	2020-12-30	Europe / Ukraine / Ukraine	Human	Original			Nanopore MinION				B.1.177.44	GV
hCoV-19/Ukraine/UA-RIVM-21891/2020	EPI_ISL_3253277	2020-12-31	Europe / Ukraine / Ukraine	Human	Original			Nanopore MinION				B.1	GV
hCoV-19/Ukraine/UA-RIVM-21893/2020	EPI_ISL_3253278	2020-12-29	Europe / Ukraine / Ukraine	Human	Original			Nanopore MinION				B.1.1.243	GR
hCoV-19/Ukraine/UA-RIVM-46423/2021	EPI_ISL_3253279	2021-01-02	Europe / Ukraine / Ukraine	Human	Original			Nanopore MinION				B.1	G
hCoV-19/Ukraine/UA-RIVM-21894/2020	EPI_ISL_3253280	2020-12-29	Europe / Ukraine / Ukraine	Human	Original			Nanopore MinION				B.1.1.325	GR
hCoV-19/Ukraine/UA-RIVM-21895/2020	EPI_ISL_3253281	2020-12-31	Europe / Ukraine / Ukraine	Human	Original			Nanopore MinION				B.1.131	G
hCoV-19/Ukraine/UA-RIVM-21898/2020	EPI_ISL_3253282	2020-12-29	Europe / Ukraine / Ukraine	Human	Original			Nanopore MinION				B.1.1.243	GR
hCoV-19/Ukraine/UA-RIVM-21899/2020	EPI_ISL_3253283	2020-12-29	Europe / Ukraine / Ukraine	Human	Original			Nanopore MinION				B.1.221	G
hCoV-19/Ukraine/UA-RIVM-21900/2020	EPI_ISL_3253284	2020-12-30	Europe / Ukraine / Ukraine	Human	Original			Nanopore MinION				B.1.127	G
hCoV-19/Ukraine/UA-RIVM-21901/2020	EPI_ISL_3253285	2020-12-31	Europe / Ukraine / Ukraine	Human	Original			Nanopore MinION				B.1.1.311	GR
hCoV-19/Ukraine/UA-RIVM-21902/2020	EPI_ISL_3253286	2020-12-30	Europe / Ukraine / Ukraine	Human	Original			Nanopore MinION				B.1	G
hCoV-19/Ukraine/UA-RIVM-46424/2021	EPI_ISL_3253287	2021-01-02	Europe / Ukraine / Ukraine	Human	Original			Nanopore MinION				B.1.1.159	GR
hCoV-19/Ukraine/UA-RIVM-21906/2020	EPI_ISL_3253288	2020-12-30	Europe / Ukraine / Ukraine	Human	Original			Nanopore MinION				B.1.1	GR
hCoV-19/Ukraine/UA-RIVM-21907/2020	EPI_ISL_3253289	2020-12-31	Europe / Ukraine / Ukraine	Human	Original			Nanopore MinION				B.1.1	GR
hCoV-19/Ukraine/UA-RIVM-21908/2020	EPI_ISL_3253290	2020-12-30	Europe / Ukraine / Ukraine	Human	Original			Nanopore MinION				B.1	G
hCoV-19/Ukraine/UA-RIVM-21918/2020	EPI_ISL_3253291	2020-12-30	Europe / Ukraine / Ukraine	Human	Original			Nanopore MinION				B.1.1.1	GR
hCoV-19/Ukraine/UA-RIVM-21909/2020	EPI_ISL_3253292	2020-12-31	Europe / Ukraine / Ukraine	Human	Original			Nanopore MinION				B.1	G
hCoV-19/Ukraine/UA-RIVM-21910/2020	EPI_ISL_3253293	2020-12-30	Europe / Ukraine / Ukraine	Human	Original			Nanopore MinION				B.1.404	G
hCoV-19/Ukraine/UA-RIVM-21914/2020	EPI_ISL_3253294	2020-12-31	Europe / Ukraine / Ukraine	Human	Original			Nanopore MinION				B.1	G
hCoV-19/Ukraine/UA-RIVM-21915/2020	EPI_ISL_3253295	2020-12-30	Europe / Ukraine / Ukraine	Human	Original			Nanopore MinION				B.1.1.1	GR
hCoV-19/Ukraine/UA-RIVM-21916/2020	EPI_ISL_3253296	2020-12-31	Europe / Ukraine / Ukraine	Human	Original			Nanopore MinION				B.1.1	GR
hCoV-19/Ukraine/UA-RIVM-21917/2020	EPI_ISL_3253297	2020-12-31	Europe / Ukraine / Ukraine	Human	Original			Nanopore MinION				B.1.1.159	GR
hCoV-19/Ukraine/70-65180/2021	EPI_ISL_3262118	2021-06-10	Europe / Ukraine / Mariupol	Human	Original			Ion Torrent		NS8_Q27stop results in 78.5% truncation of the protein sequence. Gap of 22 nucleotides when compared to the reference sequence.	info	B.1.1.7	GR
hCoV-19/Ukraine/11-62711/2021	EPI_ISL_3262119	2021-07-13	Europe / Ukraine / Kyiv	Human	Original			Ion Torrent		Insertion of 1 nucleotides when compared to the reference sequence. Gap of 12 nucleotides when compared to the reference sequence.	info	B.1.617.2	GK
hCoV-19/Ukraine/20-62720/2021	EPI_ISL_3262120	2021-07-06	Europe / Ukraine / Lutsk	Human	Original			Ion Torrent		Gap of 12 nucleotides when compared to the reference sequence.	info	B.1.617.2	GK
hCoV-19/Ukraine/16-62716/2021	EPI_ISL_3262121	2021-07-12	Europe / Ukraine / Kyiv	Human	Original			Ion Torrent		Gap of 13 nucleotides when compared to the reference sequence.	info	B.1.617.2	GK
hCoV-19/Ukraine/42-62254/2021	EPI_ISL_3262122	2021-06-17	Europe / Ukraine / Poltava	Human	Original			Ion Torrent		NS8_Q27stop results in 78.5% truncation of the protein sequence. Gap of 19 nucleotides when compared to the reference sequence.	info	B.1.1.7	GR
hCoV-19/Ukraine/44-62269/2021	EPI_ISL_3262123	2021-06-22	Europe / Ukraine / Poltava	Human	Original			Ion Torrent		Gap of 12 nucleotides when compared to the reference sequence.	info	B.1.617.2	GK
hCoV-19/Ukraine/54-62366/2021	EPI_ISL_3262124	2021-06-21	Europe / Ukraine / Odesa	Human	Original			Ion Torrent		NS8_K68stop results in 44.6% truncation of the protein sequence. NS8_Q27stop results in 78.5% truncation of the protein sequence. Gap of 19 nucleotides when compared to the reference sequence.	info	B.1.1.7	GR
hCoV-19/Ukraine/41-62250/2021	EPI_ISL_3262125	2021-06-15	Europe / Ukraine / Poltava	Human	Original			Ion Torrent		NS8_K68stop results in 44.6% truncation of the protein sequence. NS8_Q27stop results in 78.5% truncation of the protein sequence. Gap of 19 nucleotides when compared to the reference sequence.	info	B.1.1.7	GR
hCoV-19/Ukraine/36-62199/2021	EPI_ISL_3262126	2021-06-22	Europe / Ukraine / Dnipro	Human	Original			Ion Torrent		Gap of 12 nucleotides when compared to the reference sequence.	info	B.1.617.2	GK
hCoV-19/Ukraine/30-62142/2021	EPI_ISL_3262127	2021-06-16	Europe / Ukraine / Khmelnytskyi	Human	Original			Ion Torrent		NS8_K68stop results in 44.6% truncation of the protein sequence. NS8_Q27stop results in 78.5% truncation of the protein sequence. Gap of 18 nucleotides when compared to the reference sequence.	info	B.1.1.7	GR
hCoV-19/Ukraine/40-62246/2021	EPI_ISL_3262128	2021-06-17	Europe / Ukraine / Dnipro	Human	Original			Ion Torrent		Gap of 13 nucleotides when compared to the reference sequence.	info	B.1.617.2	GK
hCoV-19/Ukraine/13-62717/2021	EPI_ISL_3262129	2021-07-13	Europe / Ukraine / Kyiv	Human	Original			Ion Torrent		Gap of 13 nucleotides when compared to the reference sequence.	info	B.1.617.2	GK
hCoV-19/Ukraine/31-62149/2021	EPI_ISL_3262130	2021-06-08	Europe / Ukraine / Cherkasy	Human	Original			Ion Torrent		NS8_K68stop results in 44.6% truncation of the protein sequence. NS8_Q27stop results in 78.5% truncation of the protein sequence. Gap of 19 nucleotides when compared to the reference sequence.	info	B.1.1.7	GR
hCoV-19/Ukraine/59-62378/2021	EPI_ISL_3262131	2021-06-17	Europe / Ukraine / Khmelnytskyi	Human	Original			Ion Torrent		NS8_K68stop results in 44.6% truncation of the protein sequence. NS8_Q27stop results in 78.5% truncation of the protein sequence. Gap of 19 nucleotides when compared to the reference sequence.	info	B.1.1.7	GR
hCoV-19/Ukraine/28-62122/2021	EPI_ISL_3262132	2021-06-13	Europe / Ukraine / Khmelnytskyi	Human	Original			Ion Torrent		NS8_Q27stop results in 78.5% truncation of the protein sequence. Gap of 19 nucleotides when compared to the reference sequence.	info	B.1.1.7	GR
hCoV-19/Ukraine/17-62717/2021	EPI_ISL_3262133	2021-07-12	Europe / Ukraine / Kyiv	Human	Original			Ion Torrent		Gap of 13 nucleotides when compared to the reference sequence.	info	B.1.617.2	GK
hCoV-19/Ukraine/56-62372/2021	EPI_ISL_3262134	2021-06-14	Europe / Ukraine / Cherkasy	Human	Original			Ion Torrent		NS7a_Q62stop results in 49.6% truncation of the protein sequence. NS8_Q27stop results in 78.5% truncation of the protein sequence. Gap of 53 nucleotides when compared to the reference sequence.	warn	B.1.1.7	GR
hCoV-19/Ukraine/39-62235/2021	EPI_ISL_3262135	2021-06-23	Europe / Ukraine / Dnipro	Human	Original			Ion Torrent		NS8_Q27stop results in 78.5% truncation of the protein sequence. Gap of 18 nucleotides when compared to the reference sequence.	info	B.1.1.7	GR
hCoV-19/Ukraine/09-62679/2021	EPI_ISL_3262136	2021-07-07	Europe / Ukraine / Kyiv	Human	Original			Ion Torrent		Gap of 13 nucleotides when compared to the reference sequence.	info	B.1.617.2	GK
hCoV-19/Ukraine/57-62374/2021	EPI_ISL_3262137	2021-06-14	Europe / Ukraine / Cherkasy	Human	Original			Ion Torrent		NS8_Q27stop results in 78.5% truncation of the protein sequence. NS8_E106stop results in 13.2% truncation of the protein sequence. Gap of 19 nucleotides when compared to the reference sequence.	info	B.1.1.7	GR
hCoV-19/Ukraine/22-62723/2021	EPI_ISL_3262138	2021-07-05	Europe / Ukraine / Lutsk	Human	Original			Ion Torrent		Gap of 13 nucleotides when compared to the reference sequence.	info	B.1.617.2	GK
hCoV-19/Ukraine/UA-RIVM-21911/2020	EPI_ISL_3314947	2020-12-31	Europe / Ukraine / Ukraine	Human	Original			Nanopore MinION		Insertion of 2 nucleotide(s) found at refpos 28251 (frameshift confirmed by the submitter).	warn	B.1.1	GR
hCoV-19/Ukraine/UA-RIVM-21897/2020	EPI_ISL_3314948	2020-12-29	Europe / Ukraine / Ukraine	Human	Original			Nanopore MinION		Gap of 4 nucleotide(s) found at refpos 26158 (frameshift confirmed by the submitter).	warn	B.1	G
hCoV-19/Ukraine/UA-RIVM-21904/2020	EPI_ISL_3314949	2020-12-29	Europe / Ukraine / Ukraine	Human	Original			Nanopore MinION		Gap of 4 nucleotide(s) found at refpos 26158 (frameshift confirmed by the submitter).	warn	B.1	G
hCoV-19/Ukraine/HCL021165512001/2020	EPI_ISL_4260382	2020-11-22	Europe / Ukraine / Kyiv	Human	Original			Illumina NextSeq				B.1.1.351	GR
hCoV-19/Ukraine/HCL021165909501/2021	EPI_ISL_4260384	2021-01-12	Europe / Ukraine / Kyiv	Human	Original			Illumina NextSeq				B.1.1.57	GR
hCoV-19/Ukraine/HCL021165913401/2021	EPI_ISL_4260386	2021-03-26	Europe / Ukraine / Kyiv	Human	Original			Illumina NextSeq		NS8_K68stop results in 44.6% truncation of the protein sequence. NS8_Q27stop results in 78.5% truncation of the protein sequence. Gap of 19 nucleotides when compared to the reference WIV04 sequence.	info	B.1.1.7	GR
hCoV-19/Ukraine/HCL021165795701/2021	EPI_ISL_4260388	2021-02-22	Europe / Ukraine / Kyiv	Human	Original			Illumina NextSeq				B.1.1.374	GR
hCoV-19/Ukraine/HCL021165525101/2021	EPI_ISL_4260390	2021-02-22	Europe / Ukraine / Kyiv	Human	Original			Illumina NextSeq		NS8_Q27stop results in 78.5% truncation of the protein sequence. Gap of 19 nucleotides when compared to the reference WIV04 sequence.	info	B.1.1.7	GR
hCoV-19/Ukraine/HCL021165521701/2021	EPI_ISL_4260392	2021-02-22	Europe / Ukraine / Kyiv	Human	Original			Illumina NextSeq		Stretches of NNNs (1.47% of overall sequence).	warn	B.1.1.351	GR
hCoV-19/Ukraine/HCL021165520101/2021	EPI_ISL_4260393	2021-02-25	Europe / Ukraine / Kyiv	Human	Original			Illumina NextSeq		NS8_K68stop results in 44.6% truncation of the protein sequence. NS8_Q27stop results in 78.5% truncation of the protein sequence. Gap of 19 nucleotides when compared to the reference WIV04 sequence.	info	B.1.1.7	GR
hCoV-19/Ukraine/HCL021165518001/2021	EPI_ISL_4260395	2021-02-25	Europe / Ukraine / Kyiv	Human	Original			Illumina NextSeq		NS8_K68stop results in 44.6% truncation of the protein sequence. NS8_Q27stop results in 78.5% truncation of the protein sequence. Gap of 19 nucleotides when compared to the reference WIV04 sequence.	info	B.1.1.7	GR
hCoV-19/Ukraine/HCL021165516301/2021	EPI_ISL_4260396	2021-03-09	Europe / Ukraine / Kyiv	Human	Original			Illumina NextSeq		NS8_Q27stop results in 78.5% truncation of the protein sequence. Gap of 19 nucleotides when compared to the reference WIV04 sequence.	info	B.1.1.7	GR
hCoV-19/Ukraine/HCL021165513901/2020	EPI_ISL_4260398	2020-11-24	Europe / Ukraine / Kyiv	Human	Original			Illumina NextSeq				B.1.1.243	GR
hCoV-19/Ukraine/HCL021165799401/2021	EPI_ISL_4260400	2021-02-21	Europe / Ukraine / Kyiv	Human	Original			Illumina NextSeq		NS8_K68stop results in 44.6% truncation of the protein sequence. NS8_Q27stop results in 78.5% truncation of the protein sequence. Gap of 19 nucleotides when compared to the reference WIV04 sequence.	info	B.1.1.7	GR
hCoV-19/Ukraine/HCL021165500501/2021	EPI_ISL_4260402	2021-02-22	Europe / Ukraine / Dnipro	Human	Original			Illumina NextSeq		NS8_Q27stop results in 78.5% truncation of the protein sequence. Gap of 19 nucleotides when compared to the reference WIV04 sequence.	info	B.1.1.7	GR
hCoV-19/Ukraine/HCL021165505601/2021	EPI_ISL_4260404	2021-02-22	Europe / Ukraine / Dnipro	Human	Original			Illumina NextSeq		NS8_Q27stop results in 78.5% truncation of the protein sequence. Gap of 19 nucleotides when compared to the reference WIV04 sequence.	info	B.1.1.7	GR
hCoV-19/Ukraine/HCL021165507601/2021	EPI_ISL_4260406	2021-02-22	Europe / Ukraine / Dnipro	Human	Original			Illumina NextSeq				B.1.1.351	GR
hCoV-19/Ukraine/HCL021165509501/2021	EPI_ISL_4260408	2021-02-22	Europe / Ukraine / Dnipro	Human	Original			Illumina NextSeq		NS8_K68stop results in 44.6% truncation of the protein sequence. NS8_Q27stop results in 78.5% truncation of the protein sequence. Gap of 19 nucleotides when compared to the reference WIV04 sequence.	info	B.1.1.7	GR
hCoV-19/Ukraine/HCL021165805401/2021	EPI_ISL_4260410	2021-05-14	Europe / Ukraine / Dnipro	Human	Original			Illumina NextSeq		Insertion of 3 nucleotides when compared to the reference WIV04 sequence. Gap of 9 nucleotides when compared to the reference WIV04 sequence.	info	B.1.1.523	GR
hCoV-19/Ukraine/HCL021165809701/2021	EPI_ISL_4260411	2021-05-14	Europe / Ukraine / Dnipro	Human	Original			Illumina NextSeq		NS8_Q27stop results in 78.5% truncation of the protein sequence. Gap of 19 nucleotides when compared to the reference WIV04 sequence.	info	B.1.1.7	GR
hCoV-19/Ukraine/HCL021165813801/2021	EPI_ISL_4260413	2021-05-14	Europe / Ukraine / Dnipro	Human	Original			Illumina NextSeq		NS8_Q27stop results in 78.5% truncation of the protein sequence. Gap of 19 nucleotides when compared to the reference WIV04 sequence.	info	B.1.1.7	GR
hCoV-19/Ukraine/HCL021165818701/2021	EPI_ISL_4260414	2021-05-14	Europe / Ukraine / Dnipro	Human	Original			Illumina NextSeq		NS8_Q27stop results in 78.5% truncation of the protein sequence. Gap of 19 nucleotides when compared to the reference WIV04 sequence.	info	B.1.1.7	GR
hCoV-19/Ukraine/HCL021165827901/2021	EPI_ISL_4260416	2021-05-17	Europe / Ukraine / Dnipro	Human	Original			Illumina NextSeq		NS8_Q27stop results in 78.5% truncation of the protein sequence. Gap of 19 nucleotides when compared to the reference WIV04 sequence.	info	B.1.1.7	GR
hCoV-19/Ukraine/HCL021165832901/2021	EPI_ISL_4260418	2021-05-17	Europe / Ukraine / Dnipro	Human	Original			Illumina NextSeq		NS8_K68stop results in 44.6% truncation of the protein sequence. NS8_Q27stop results in 78.5% truncation of the protein sequence. Gap of 19 nucleotides when compared to the reference WIV04 sequence.	info	B.1.1.7	GR
hCoV-19/Ukraine/HCL021165839901/2021	EPI_ISL_4260420	2021-05-17	Europe / Ukraine / Dnipro	Human	Original			Illumina NextSeq		NS8_K68stop results in 44.6% truncation of the protein sequence. NS8_Q27stop results in 78.5% truncation of the protein sequence. Gap of 19 nucleotides when compared to the reference WIV04 sequence.	info	B.1.1.7	GR
hCoV-19/Ukraine/HCL021165852801/2021	EPI_ISL_4260424	2021-05-18	Europe / Ukraine / Dnipro	Human	Original			Illumina NextSeq		NS8_K68stop results in 44.6% truncation of the protein sequence. NS8_Q27stop results in 78.5% truncation of the protein sequence. Gap of 19 nucleotides when compared to the reference WIV04 sequence.	info	B.1.1.7	GR
hCoV-19/Ukraine/HCL021165869401/2021	EPI_ISL_4260427	2021-05-18	Europe / Ukraine / Dnipro	Human	Original			Illumina NextSeq		NS8_K68stop results in 44.6% truncation of the protein sequence. NS8_Q27stop results in 78.5% truncation of the protein sequence. Gap of 19 nucleotides when compared to the reference WIV04 sequence.	info	B.1.1.7	GR
hCoV-19/Ukraine/HCL021165873001/2021	EPI_ISL_4260429	2021-05-20	Europe / Ukraine / Dnipro	Human	Original			Illumina NextSeq		NS8_Q27stop results in 78.5% truncation of the protein sequence. Gap of 19 nucleotides when compared to the reference WIV04 sequence.	info	B.1.1.7	GR
hCoV-19/Ukraine/HCL021165876501/2021	EPI_ISL_4260430	2021-05-20	Europe / Ukraine / Dnipro	Human	Original			Illumina NextSeq		NS8_K68stop results in 44.6% truncation of the protein sequence. NS8_Q27stop results in 78.5% truncation of the protein sequence. Gap of 19 nucleotides when compared to the reference WIV04 sequence.	info	B.1.1.7	GR
hCoV-19/Ukraine/HCL021165879401/2021	EPI_ISL_4260432	2021-05-21	Europe / Ukraine / Dnipro	Human	Original			Illumina NextSeq		NS8_K68stop results in 44.6% truncation of the protein sequence. NS8_Q27stop results in 78.5% truncation of the protein sequence. Gap of 19 nucleotides when compared to the reference WIV04 sequence.	info	B.1.1.7	GR
hCoV-19/Ukraine/HCL021165882401/2021	EPI_ISL_4260433	2021-05-21	Europe / Ukraine / Dnipro	Human	Original			Illumina NextSeq		NS8_Q27stop results in 78.5% truncation of the protein sequence. Gap of 19 nucleotides when compared to the reference WIV04 sequence.	info	B.1.1.7	GR
hCoV-19/Ukraine/HCL021165885601/2021	EPI_ISL_4260435	2021-05-24	Europe / Ukraine / Dnipro	Human	Original			Illumina NextSeq		NS8_K68stop results in 44.6% truncation of the protein sequence. NS8_Q27stop results in 78.5% truncation of the protein sequence. Gap of 19 nucleotides when compared to the reference WIV04 sequence.	info	B.1.1.7	GR
hCoV-19/Ukraine/HCL021165888901/2021	EPI_ISL_4260436	2021-05-24	Europe / Ukraine / Dnipro	Human	Original			Illumina NextSeq		NS8_Q27stop results in 78.5% truncation of the protein sequence. Gap of 19 nucleotides when compared to the reference WIV04 sequence.	info	B.1.1.7	GR
hCoV-19/Ukraine/HCL021165891401/2021	EPI_ISL_4260438	2021-05-24	Europe / Ukraine / Dnipro	Human	Original			Illumina NextSeq		NS8_K68stop results in 44.6% truncation of the protein sequence. NS8_Q27stop results in 78.5% truncation of the protein sequence. Gap of 19 nucleotides when compared to the reference WIV04 sequence.	info	B.1.1.7	GR
hCoV-19/Ukraine/HCL021165900901/2021	EPI_ISL_4260440	2021-05-25	Europe / Ukraine / Dnipro	Human	Original			Illumina NextSeq		NS8_K68stop results in 44.6% truncation of the protein sequence. NS8_Q27stop results in 78.5% truncation of the protein sequence. Gap of 19 nucleotides when compared to the reference WIV04 sequence.	info	B.1.1.7	GR
hCoV-19/Ukraine/HCL021165905301/2021	EPI_ISL_4260442	2021-05-25	Europe / Ukraine / Dnipro	Human	Original			Illumina NextSeq		NS8_K68stop results in 44.6% truncation of the protein sequence. NS8_Q27stop results in 78.5% truncation of the protein sequence. Gap of 19 nucleotides when compared to the reference WIV04 sequence.	info	B.1.1.7	GR
hCoV-19/Ukraine/HCL021165894701/2021	EPI_ISL_4260444	2021-05-24	Europe / Ukraine / Dnipro	Human	Original			Illumina NextSeq		NS8_K68stop results in 44.6% truncation of the protein sequence. NS8_Q27stop results in 78.5% truncation of the protein sequence. Gap of 19 nucleotides when compared to the reference WIV04 sequence.	info	B.1.1.7	GR
hCoV-19/Ukraine/HCL021165857001/2021	EPI_ISL_4260445	2021-05-18	Europe / Ukraine / Dnipro	Human	Original			Illumina NextSeq		NS8_Q27stop results in 78.5% truncation of the protein sequence. Gap of 19 nucleotides when compared to the reference WIV04 sequence.	info	B.1.1.7	GR
hCoV-19/Ukraine/HCL021165488001/2021	EPI_ISL_4260449	2021-05-17	Europe / Ukraine / Khmelnytskyi	Human	Original			Illumina NextSeq		NS8_K68stop results in 44.6% truncation of the protein sequence. NS8_Q27stop results in 78.5% truncation of the protein sequence. Gap of 25 nucleotides when compared to the reference WIV04 sequence.	info	B.1.1.7	GR
hCoV-19/Ukraine/HCL021165478101/2021	EPI_ISL_4260450	2021-05-17	Europe / Ukraine / Khmelnytskyi	Human	Original			Illumina NextSeq		NS8_K68stop results in 44.6% truncation of the protein sequence. NS8_Q27stop results in 78.5% truncation of the protein sequence. Gap of 25 nucleotides when compared to the reference WIV04 sequence.	info	B.1.1.7	GR
hCoV-19/Ukraine/06-62592-1/2021	EPI_ISL_4440036	2021-06-26	Europe / Ukraine / Rivne	Human	Original			Ion Torrent				B.1.1.159	GR
hCoV-19/Ukraine/07-62592-4/2021	EPI_ISL_4440039	2021-06-14	Europe / Ukraine / Rivne	Human	Original			Ion Torrent				B.1.1.159	GR
hCoV-19/Ukraine/10-62710/2021	EPI_ISL_4440042	2021-07-13	Europe / Ukraine / Kyiv	Human	Original			Ion Torrent		Stretches of NNNs (1.02% of overall sequence). NS7a_Q62stop results in 49.6% truncation of the protein sequence. NS8_Q27stop results in 78.5% truncation of the protein sequence. Gap of 19 nucleotides when compared to the reference WIV04 sequence.	warn	B.1.1.7	GR
hCoV-19/Ukraine/14-62714/2021	EPI_ISL_4440044	2021-07-13	Europe / Ukraine / Kyiv	Human	Original			Ion Torrent		Stretches of NNNs (1.83% of overall sequence). Insertion of 1 nucleotide(s) found at refpos 5945 (FRAMESHIFT not confirmed by the submitter). Insertion of 1 nucleotide(s) found at refpos 17619 (FRAMESHIFT not confirmed by the submitter). Gap of 1 nucleotide(s) found at refpos 21818 (FRAMESHIFT not confirmed by the submitter). Gap of 1 nucleotide(s) at refpos 21818 was previously seen. Spike_C136s…	warn	AY.11	GK
hCoV-19/Ukraine/15-62715/2021	EPI_ISL_4440046	2021-07-12	Europe / Ukraine / Kyiv	Human	Original			Ion Torrent		Gap of 25 nucleotide(s) found at refpos 21813 (FRAMESHIFT not confirmed by the submitter). Gap of 37 nucleotides when compared to the reference WIV04 sequence.	warn	B.1.617.2	GK
hCoV-19/Ukraine/18-62718/2021	EPI_ISL_4440048	2021-07-12	Europe / Ukraine / Kyiv	Human	Original			Ion Torrent		Gap of 13 nucleotides when compared to the reference WIV04 sequence.	info	AY.20	GK
hCoV-19/Ukraine/19-62719/2021	EPI_ISL_4440051	2021-07-12	Europe / Ukraine / Kyiv	Human	Original			Ion Torrent		Long stretches of NNNs (6.52% of overall sequence). Insertion of 1 nucleotide(s) found at refpos 1680 (FRAMESHIFT not confirmed by the submitter). Insertion of 1 nucleotide(s) found at refpos 13475 (FRAMESHIFT not confirmed by the submitter). Insertion of 1 nucleotide(s) found at refpos 21803 (FRAMESHIFT not confirmed by the submitter). Insertion of 1 nucleotide(s) found at refpos 25045 (FRAMESHI…	alert	AY.4	GK
hCoV-19/Ukraine/21-62721/2021	EPI_ISL_4440053	2021-07-06	Europe / Ukraine / Lutsk	Human	Original			Ion Torrent		NS7a_I110stop results in 9.9% truncation of the protein sequence. NS7a_S98stop results in 19.8% truncation of the protein sequence. NS7a_I103stop results in 15.7% truncation of the protein sequence. Gap of 85 nucleotides when compared to the reference WIV04 sequence. %UniqueMutations 0.06%.	warn	B.1.617.2	GK
hCoV-19/Ukraine/24-62725/2021	EPI_ISL_4440055	2021-07-06	Europe / Ukraine / Lutsk	Human	Original			Ion Torrent		Gap of 72 nucleotides when compared to the reference WIV04 sequence.	warn	AY.29	GK
hCoV-19/Ukraine/25-62726/2021	EPI_ISL_4440057	2021-07-06	Europe / Ukraine / Lutsk	Human	Original			Ion Torrent		Gap of 12 nucleotides when compared to the reference WIV04 sequence.	info	B.1.617.2	GK
hCoV-19/Ukraine/26-62727/2021	EPI_ISL_4440060	2021-07-07	Europe / Ukraine / Lutsk	Human	Original			Ion Torrent		Gap of 13 nucleotides when compared to the reference WIV04 sequence.	info	B.1.617.2	GK
hCoV-19/Ukraine/27-62728/2021	EPI_ISL_4440062	2021-07-07	Europe / Ukraine / Lutsk	Human	Original			Ion Torrent		Gap of 12 nucleotides when compared to the reference WIV04 sequence.	info	AY.4	GK
hCoV-19/Ukraine/29-62125/2021	EPI_ISL_4440064	2021-06-16	Europe / Ukraine / Khmelnytskyi	Human	Original			Ion Torrent		NS8_Q27stop results in 78.5% truncation of the protein sequence. Gap of 49 nucleotides when compared to the reference WIV04 sequence.	warn	B.1.1.7	GR
hCoV-19/Ukraine/32-62152/2021	EPI_ISL_4440066	2021-06-17	Europe / Ukraine / Khmelnytskyi	Human	Original			Ion Torrent		NS8_Q27stop results in 78.5% truncation of the protein sequence. Gap of 18 nucleotides when compared to the reference WIV04 sequence.	info	B.1.1.7	GR
hCoV-19/Ukraine/33-62164/2021	EPI_ISL_4440068	2021-06-18	Europe / Ukraine / Khmelnytskyi	Human	Original			Ion Torrent		Gap of 13 nucleotides when compared to the reference WIV04 sequence.	info	B.1.617.2	GK
hCoV-19/Ukraine/37-62200/2021	EPI_ISL_4440071	2021-06-22	Europe / Ukraine / Dnipro	Human	Original			Ion Torrent		Insertion of 2 nucleotide(s) found at refpos 9797 (FRAMESHIFT not confirmed by the submitter). NSP4_L422stop results in 15.8% truncation of the protein sequence. Gap of 91 nucleotides when compared to the reference WIV04 sequence. %UniqueMutations 0.07%.	warn	B.1.617.2	GK
hCoV-19/Ukraine/38-62208/2021	EPI_ISL_4440073	2021-06-22	Europe / Ukraine / Dnipro	Human	Original			Ion Torrent		Gap of 37 nucleotide(s) found at refpos 21396 (FRAMESHIFT not confirmed by the submitter). Gap of 2 nucleotide(s) found at refpos 26159 (FRAMESHIFT not confirmed by the submitter). Gap of 2 nucleotide(s) at refpos 26159 was previously seen. NS8_K68stop results in 44.6% truncation of the protein sequence. NS8_Q27stop results in 78.5% truncation of the protein sequence. Insertion of 3 nucleotides w…	warn	B.1.1.7	GR
hCoV-19/Ukraine/43-62266/2021	EPI_ISL_4440075	2021-06-22	Europe / Ukraine / Poltava	Human	Original			Ion Torrent		Gap of 12 nucleotides when compared to the reference WIV04 sequence. %UniqueMutations 0.11%.	warn	B.1.1	GR
hCoV-19/Ukraine/46-62271/2021	EPI_ISL_4440077	2021-06-22	Europe / Ukraine / Poltava	Human	Original			Ion Torrent		Gap of 296 nucleotide(s) found at refpos 2169 (FRAMESHIFT not confirmed by the submitter). Gap of 152 nucleotide(s) found at refpos 3189 (FRAMESHIFT not confirmed by the submitter). Gap of 160 nucleotide(s) found at refpos 3734 (FRAMESHIFT not confirmed by the submitter). Gap of 154 nucleotide(s) found at refpos 9474 (FRAMESHIFT not confirmed by the submitter). Gap of 113 nucleotide(s) found at r…	warn	B.1.1.7	GR
hCoV-19/Ukraine/47-62349/2021	EPI_ISL_4440078	2021-06-21	Europe / Ukraine / Odesa	Human	Original			Ion Torrent		Gap of 13 nucleotides when compared to the reference WIV04 sequence.	info	B.1.617.2	GK
hCoV-19/Ukraine/50-62352/2021	EPI_ISL_4440080	2021-06-21	Europe / Ukraine / Odesa	Human	Original			Ion Torrent		Gap of 12 nucleotides when compared to the reference WIV04 sequence.	info	B.1.617.2	GK
hCoV-19/Ukraine/51-62353/2021	EPI_ISL_4440082	2021-06-21	Europe / Ukraine / Odesa	Human	Original			Ion Torrent		Stretches of NNNs (3.17% of overall sequence). NSP2_L549stop results in 14.1% truncation of the protein sequence. Insertion of 6 nucleotides when compared to the reference WIV04 sequence. Gap of 426 nucleotides when compared to the reference WIV04 sequence.	warn	B.1.617.2	G
hCoV-19/Ukraine/52-62364/2021	EPI_ISL_4440084	2021-06-21	Europe / Ukraine / Odesa	Human	Original			Ion Torrent		NS8_K68stop results in 44.6% truncation of the protein sequence. NS8_Q27stop results in 78.5% truncation of the protein sequence. Gap of 18 nucleotides when compared to the reference WIV04 sequence.	info	B.1.1.7	GR
hCoV-19/Ukraine/53-62365/2021	EPI_ISL_4440087	2021-06-21	Europe / Ukraine / Odesa	Human	Original			Ion Torrent		NS8_K68stop results in 44.6% truncation of the protein sequence. NS8_Q27stop results in 78.5% truncation of the protein sequence. Insertion of 1 nucleotides when compared to the reference WIV04 sequence. Gap of 339 nucleotides when compared to the reference WIV04 sequence. NSP11 without BLAST coverage.	warn	B.1.1.7	GR
hCoV-19/Ukraine/58-62375/2021	EPI_ISL_4440089	2021-06-14	Europe / Ukraine / Cherkasy	Human	Original			Ion Torrent		NS8_Q27stop results in 78.5% truncation of the protein sequence. Gap of 251 nucleotides when compared to the reference WIV04 sequence.	warn	B.1.1.7	GR
hCoV-19/Ukraine/60-62499/2021	EPI_ISL_4440091	2021-06-15	Europe / Ukraine / Mykolaiv	Human	Original			Ion Torrent		Long stretches of NNNs (11.39% of overall sequence). Insertion of 7 nucleotide(s) found at refpos 5555 (FRAMESHIFT not confirmed by the submitter). Gap of 152 nucleotide(s) found at refpos 7875 (FRAMESHIFT not confirmed by the submitter). Gap of 1 nucleotide(s) found at refpos 13522 (FRAMESHIFT not confirmed by the submitter). Gap of 125 nucleotide(s) found at refpos 24694 (FRAMESHIFT not confirm…	alert	B.1	G
hCoV-19/Ukraine/63-62521/2021	EPI_ISL_4440092	2021-06-17	Europe / Ukraine / Kherson	Human	Original			Ion Torrent		Stretches of NNNs (1.27% of overall sequence). Insertion of 3 nucleotides when compared to the reference WIV04 sequence. Gap of 61 nucleotides when compared to the reference WIV04 sequence.	warn	AY.4	GK
hCoV-19/Ukraine/64-62522/2021	EPI_ISL_4440093	2021-06-17	Europe / Ukraine / Kherson	Human	Original			Ion Torrent		Gap of 13 nucleotides when compared to the reference WIV04 sequence.	info	B.1.617.2	GK
hCoV-19/Ukraine/65-62523/2021	EPI_ISL_4440095	2021-06-17	Europe / Ukraine / Kherson	Human	Original			Ion Torrent		NS8_Q27stop results in 78.5% truncation of the protein sequence. Insertion of 6 nucleotides when compared to the reference WIV04 sequence. Gap of 19 nucleotides when compared to the reference WIV04 sequence.	info	B.1	G
hCoV-19/Ukraine/66-62524/2021	EPI_ISL_4440097	2021-06-18	Europe / Ukraine / Kherson	Human	Original			Ion Torrent		NS8_Q27stop results in 78.5% truncation of the protein sequence. Gap of 19 nucleotides when compared to the reference WIV04 sequence.	info	B.1.1.7	GR
hCoV-19/Ukraine/67-62555/2021	EPI_ISL_4440099	2021-06-14	Europe / Ukraine / Mariupol	Human	Original			Ion Torrent		Stretches of NNNs (2.22% of overall sequence). Insertion of 2 nucleotide(s) found at refpos 4002 (FRAMESHIFT not confirmed by the submitter). Gap of 38 nucleotide(s) found at refpos 6844 (FRAMESHIFT not confirmed by the submitter). Gap of 70 nucleotide(s) found at refpos 14443 (FRAMESHIFT not confirmed by the submitter). NS8_Q27stop results in 78.5% truncation of the protein sequence. Gap of 601 …	warn	B.1.1.7	GR
hCoV-19/Ukraine/68-62556/2021	EPI_ISL_4440101	2021-06-14	Europe / Ukraine / Mariupol	Human	Original			Ion Torrent		Stretches of NNNs (1.99% of overall sequence). Insertion of 2 nucleotide(s) found at refpos 3957 (FRAMESHIFT not confirmed by the submitter). Gap of 41 nucleotide(s) found at refpos 6842 (FRAMESHIFT not confirmed by the submitter). NS8_Q27stop results in 78.5% truncation of the protein sequence. Gap of 227 nucleotides when compared to the reference WIV04 sequence. %UniqueMutations 0.20%.	warn	B.1.1.7	GR
hCoV-19/Ukraine/69-62558/2021	EPI_ISL_4440103	2021-06-14	Europe / Ukraine / Mariupol	Human	Original			Ion Torrent		NSP4_F317stop results in 36.8% truncation of the protein sequence. NSP4_ins320stop results in 36.2% truncation of the protein sequence. NS8_K68stop results in 44.6% truncation of the protein sequence. NS8_Q27stop results in 78.5% truncation of the protein sequence. Insertion of 3 nucleotides when compared to the reference WIV04 sequence. Gap of 27 nucleotides when compared to the reference WIV04 …	warn	B.1.1.7	GR
hCoV-19/Ukraine/203100317/2020	EPI_ISL_512597	2020-06-23	Europe / Ukraine	Human	Original			Illumina NextSeq	PHE pipeline (BWA-SAMtools-Quasibam)			B.1.1	GR
hCoV-19/Ukraine/203100318/2020	EPI_ISL_512598	2020-06-23	Europe / Ukraine	Human	Original			Illumina NextSeq	PHE pipeline (BWA-SAMtools-Quasibam)			B.1	G
hCoV-19/Ukraine/203100319/2020	EPI_ISL_512599	2020-06-23	Europe / Ukraine	Human	Original			Illumina NextSeq	PHE pipeline (BWA-SAMtools-Quasibam)			B.1	G
hCoV-19/Ukraine/203100320/2020	EPI_ISL_512600	2020-06-23	Europe / Ukraine	Human	Original			Illumina NextSeq	PHE pipeline (BWA-SAMtools-Quasibam)			B.1	G
hCoV-19/Ukraine/203100321/2020	EPI_ISL_512601	2020-06-23	Europe / Ukraine	Human	Original			Illumina NextSeq	PHE pipeline (BWA-SAMtools-Quasibam)	Stretches of NNNs (1.13% of overall sequence).	warn	B.1	G
hCoV-19/Ukraine/203100322/2020	EPI_ISL_512602	2020-05-26	Europe / Ukraine	Human	Original			Illumina NextSeq	PHE pipeline (BWA-SAMtools-Quasibam)	Stretches of NNNs (1.02% of overall sequence).	warn	B.1	G
hCoV-19/Ukraine/203100323/2020	EPI_ISL_512603	2020-05-27	Europe / Ukraine	Human	Original			Illumina NextSeq	PHE pipeline (BWA-SAMtools-Quasibam)			B.1.1	GR
hCoV-19/Ukraine/203100324/2020	EPI_ISL_512604	2020-05-27	Europe / Ukraine	Human	Original			Illumina NextSeq	PHE pipeline (BWA-SAMtools-Quasibam)			B.1.1	GR
hCoV-19/Ukraine/203100325/2020	EPI_ISL_512605	2020-05-27	Europe / Ukraine	Human	Original			Illumina NextSeq	PHE pipeline (BWA-SAMtools-Quasibam)			B.1	G
hCoV-19/Ukraine/203100327/2020	EPI_ISL_512606	2020-05-27	Europe / Ukraine	Human	Original			Illumina NextSeq	PHE pipeline (BWA-SAMtools-Quasibam)			B.1	G
hCoV-19/Ukraine/203100328/2020	EPI_ISL_512607	2020-05-27	Europe / Ukraine	Human	Original			Illumina NextSeq	PHE pipeline (BWA-SAMtools-Quasibam)			B.1	G
hCoV-19/Ukraine/203100329/2020	EPI_ISL_512608	2020-05-27	Europe / Ukraine	Human	Original			Illumina NextSeq	PHE pipeline (BWA-SAMtools-Quasibam)			B.1	G
hCoV-19/Ukraine/203100330/2020	EPI_ISL_512609	2020-05-27	Europe / Ukraine	Human	Original			Illumina NextSeq	PHE pipeline (BWA-SAMtools-Quasibam)			B.1	G
hCoV-19/Ukraine/203100331/2020	EPI_ISL_512610	2020-05-27	Europe / Ukraine	Human	Original			Illumina NextSeq	PHE pipeline (BWA-SAMtools-Quasibam)			B.1	G
hCoV-19/Ukraine/203100332/2020	EPI_ISL_512611	2020-05-27	Europe / Ukraine	Human	Original			Illumina NextSeq	PHE pipeline (BWA-SAMtools-Quasibam)			B.1	G
hCoV-19/Ukraine/203100333/2020	EPI_ISL_512612	2020-06-24	Europe / Ukraine	Human	Original			Illumina NextSeq	PHE pipeline (BWA-SAMtools-Quasibam)			B.1	G
hCoV-19/Ukraine/203100334/2020	EPI_ISL_512613	2020-06-26	Europe / Ukraine	Human	Original			Illumina NextSeq	PHE pipeline (BWA-SAMtools-Quasibam)	Stretches of NNNs (2.00% of overall sequence).	warn	B.1.1	GR
hCoV-19/Ukraine/203100335/2020	EPI_ISL_512614	2020-06-26	Europe / Ukraine	Human	Original			Illumina NextSeq	PHE pipeline (BWA-SAMtools-Quasibam)			B.1	G
hCoV-19/Ukraine/203100336/2020	EPI_ISL_512615	2020-06-23	Europe / Ukraine	Human	Original			Illumina NextSeq	PHE pipeline (BWA-SAMtools-Quasibam)			B.1	G
hCoV-19/Ukraine/203100337/2020	EPI_ISL_512616	2020-07-10	Europe / Ukraine	Human	Original			Illumina NextSeq	PHE pipeline (BWA-SAMtools-Quasibam)			B.1.1	GR
hCoV-19/Ukraine/203100338/2020	EPI_ISL_512617	2020-07-10	Europe / Ukraine	Human	Original			Illumina NextSeq	PHE pipeline (BWA-SAMtools-Quasibam)			B.1.1	GR
hCoV-19/Ukraine/203100339/2020	EPI_ISL_512618	2020-07-11	Europe / Ukraine	Human	Original			Illumina NextSeq	PHE pipeline (BWA-SAMtools-Quasibam)			B.1.131	G
hCoV-19/Ukraine/203100340/2020	EPI_ISL_512619	2020-05-14	Europe / Ukraine	Human	Original			Illumina NextSeq	PHE pipeline (BWA-SAMtools-Quasibam)	Stretches of NNNs (1.89% of overall sequence).	warn	B.1.1	GR
hCoV-19/Ukraine/203100341/2020	EPI_ISL_512620	2020-05-27	Europe / Ukraine	Human	Original			Illumina NextSeq	PHE pipeline (BWA-SAMtools-Quasibam)			B.1	G
hCoV-19/Ukraine/203100342/2020	EPI_ISL_512621	2020-05-27	Europe / Ukraine	Human	Original			Illumina NextSeq	PHE pipeline (BWA-SAMtools-Quasibam)			B.1	G
hCoV-19/Ukraine/203100343/2020	EPI_ISL_512622	2020-05-27	Europe / Ukraine	Human	Original			Illumina NextSeq	PHE pipeline (BWA-SAMtools-Quasibam)			B.1	G
hCoV-19/Ukraine/203100344/2020	EPI_ISL_512623	2020-05-27	Europe / Ukraine	Human	Original			Illumina NextSeq	PHE pipeline (BWA-SAMtools-Quasibam)			B.1	G
hCoV-19/Ukraine/203100345/2020	EPI_ISL_512624	2020-05-27	Europe / Ukraine	Human	Original			Illumina NextSeq	PHE pipeline (BWA-SAMtools-Quasibam)			B.1	G
hCoV-19/Ukraine/203100346/2020	EPI_ISL_512625	2020-05-27	Europe / Ukraine	Human	Original			Illumina NextSeq	PHE pipeline (BWA-SAMtools-Quasibam)			B.1	G
hCoV-19/Ukraine/203100347/2020	EPI_ISL_512626	2020-05-16	Europe / Ukraine	Human	Original			Illumina NextSeq	PHE pipeline (BWA-SAMtools-Quasibam)			B.1	G
hCoV-19/Ukraine/203100348/2020	EPI_ISL_512627	2020-05-16	Europe / Ukraine	Human	Original			Illumina NextSeq	PHE pipeline (BWA-SAMtools-Quasibam)	Stretches of NNNs (1.60% of overall sequence).	warn	B.1	G
hCoV-19/Ukraine/203100349/2020	EPI_ISL_512628	2020-06-23	Europe / Ukraine	Human	Original			Illumina NextSeq	PHE pipeline (BWA-SAMtools-Quasibam)			B.1	G
hCoV-19/Ukraine/203100350/2020	EPI_ISL_512629	2020-06-24	Europe / Ukraine	Human	Original			Illumina NextSeq	PHE pipeline (BWA-SAMtools-Quasibam)			B.1.527	G
hCoV-19/Ukraine/203100351/2020	EPI_ISL_512630	2020-06-24	Europe / Ukraine	Human	Original			Illumina NextSeq	PHE pipeline (BWA-SAMtools-Quasibam)	Long stretches of NNNs (6.93% of overall sequence). NS6 has no coverage.	alert	B.1.223	G
hCoV-19/Ukraine/203100352/2020	EPI_ISL_512631	2020-06-24	Europe / Ukraine	Human	Original			Illumina NextSeq	PHE pipeline (BWA-SAMtools-Quasibam)			B.1.527	G
hCoV-19/Ukraine/203100353/2020	EPI_ISL_512632	2020-06-24	Europe / Ukraine	Human	Original			Illumina NextSeq	PHE pipeline (BWA-SAMtools-Quasibam)			B.1.527	G
hCoV-19/Ukraine/203100354/2020	EPI_ISL_512633	2020-05-27	Europe / Ukraine	Human	Original			Illumina NextSeq	PHE pipeline (BWA-SAMtools-Quasibam)	Long stretches of NNNs (9.34% of overall sequence).	alert	B.1.1.194	GR
hCoV-19/Ukraine/203100355/2020	EPI_ISL_512634	2020-05-28	Europe / Ukraine	Human	Original			Illumina NextSeq	PHE pipeline (BWA-SAMtools-Quasibam)			B.1.1	GR
hCoV-19/Ukraine/203100356/2020	EPI_ISL_512635	2020-05-28	Europe / Ukraine	Human	Original			Illumina NextSeq	PHE pipeline (BWA-SAMtools-Quasibam)	Stretches of NNNs (1.15% of overall sequence).	warn	B.1	G
hCoV-19/Ukraine/203100357/2020	EPI_ISL_512636	2020-05-08	Europe / Ukraine	Human	Original			Illumina NextSeq	PHE pipeline (BWA-SAMtools-Quasibam)			B	V
hCoV-19/Ukraine/203100358/2020	EPI_ISL_512637	2020-05-07	Europe / Ukraine	Human	Original			Illumina NextSeq	PHE pipeline (BWA-SAMtools-Quasibam)	Stretches of NNNs (1.13% of overall sequence).	warn	B.1.1	GR
hCoV-19/Ukraine/203100359/2020	EPI_ISL_512638	2020	Europe / Ukraine	Human	Original			Illumina NextSeq	PHE pipeline (BWA-SAMtools-Quasibam)			B.1.1.1	GR
hCoV-19/Ukraine/203100360/2020	EPI_ISL_512639	2020-04-24	Europe / Ukraine	Human	Original			Illumina NextSeq	PHE pipeline (BWA-SAMtools-Quasibam)	Stretches of NNNs (1.15% of overall sequence).	warn	B.1.1	GR
hCoV-19/Ukraine/203100361/2020	EPI_ISL_512640	2020-04-24	Europe / Ukraine	Human	Original			Illumina NextSeq	PHE pipeline (BWA-SAMtools-Quasibam)			B.1.1.243	GR
hCoV-19/Ukraine/203100363/2020	EPI_ISL_512641	2020-05-16	Europe / Ukraine	Human	Original			Illumina NextSeq	PHE pipeline (BWA-SAMtools-Quasibam)			B.1	G
hCoV-19/Ukraine/203100364/2020	EPI_ISL_512642	2020-05-15	Europe / Ukraine	Human	Original			Illumina NextSeq	PHE pipeline (BWA-SAMtools-Quasibam)			B.1.1	GR
hCoV-19/Ukraine/203100365/2020	EPI_ISL_512643	2020-05-15	Europe / Ukraine	Human	Original			Illumina NextSeq	PHE pipeline (BWA-SAMtools-Quasibam)			B.1	G
hCoV-19/Ukraine/203100366/2020	EPI_ISL_512644	2020-05-16	Europe / Ukraine	Human	Original			Illumina NextSeq	PHE pipeline (BWA-SAMtools-Quasibam)	Stretches of NNNs (1.11% of overall sequence).	warn	B.1	G
hCoV-19/Ukraine/203100362/2020	EPI_ISL_512810	2020-05-15	Europe / Ukraine	Human	Original			Illumina NextSeq	PHE pipeline (BWA-SAMtools-Quasibam)	Gap of 1 nucleotide(s) found at refpos 26330 (frameshift confirmed by the submitter). Gap of 1 nucleotide(s) found at refpos 26359 (frameshift confirmed by the submitter). Gap of 14 nucleotides when compared to the reference sequence.	info	B.1	G
hCoV-19/Ukraine/Kharkiv-705/2020	EPI_ISL_576146	2020-07-28	Europe / Ukraine / Kharkiv	Human	Original	Oropharyngeal swab		Illumina ISeq100	Dragen			B.1.1.243	GR
hCoV-19/Ukraine/Ivano-Frankivsk-706/2020	EPI_ISL_576147	2020-07-28	Europe / Ukraine / Ivano-Frankivsk	Human	Original	Oropharyngeal swab		Illumina iSeq100	Dragen			B.1.1	GR
hCoV-19/Ukraine/Kyiv-785/2020	EPI_ISL_576148	2020-08-03	Europe / Ukraine / Kyiv	Human	Original	Oropharyngeal swab		Illumina iSeq100	Dragen			B.1.1	GR
hCoV-19/Ukraine/Lutsk-889/2020	EPI_ISL_576149	2020-08-06	Europe / Ukraine / Lutsk	Human	Original	Oropharyngeal swab		Illumina iSeq100	Dragen			B.1.1.325	GR
hCoV-19/Ukraine/Kharkiv-817/2020	EPI_ISL_582509	2020-08-04	Europe / Ukraine / Kharkiv	Human	Original	Oropharyngeal swab		Illumina iSeq100	Dragen			B.1.1	GR
hCoV-19/Ukraine/Kharkiv-877/2020	EPI_ISL_582510	2020-08-07	Europe / Ukraine / Kharkiv	Human	Original	Oropharyngeal swab		Illumina iSeq100	Dragen			B.1.1.243	GR
hCoV-19/Ukraine/Kharkiv-879/2020	EPI_ISL_582511	2020-08-07	Europe / Ukraine / Kharkiv	Human	Original	Oropharyngeal swab		Illumina iSeq100	Dragen			B.1.1.243	GR
hCoV-19/Ukraine/Kharkiv-882/2020	EPI_ISL_582512	2020-08-07	Europe / Ukraine / Kharkiv	Human	Original	Oropharyngeal swab		Illumina iSeq100	Dragen			B.1.1	GR
hCoV-19/Ukraine/Kharkiv-782/2020	EPI_ISL_582513	2020-07-31	Europe / Ukraine / Kharkiv	Human	Original			Illumina iSeq100	Dragen			B.1.1.243	GR
hCoV-19/Ukraine/Chernivtsi_860/2020	EPI_ISL_654818	2020-08-06	Europe / Ukraine / Chernivtsi	Human	Original	Nasopharyngeal swab		Illumina iSeq100	Dragen			B.1.1	GR
hCoV-19/Ukraine/Chernivtsi_861/2020	EPI_ISL_654819	2020-08-06	Europe / Ukraine / Chernivtsi	Human	Original	Nasopharyngeal swab		Illumina iSeq100	Dragen			B.1.1	GR
hCoV-19/Ukraine/Lutsk_824/2020	EPI_ISL_654820	2020-08-04	Europe / Ukraine / Lutsk	Human	Original	Nasopharyngeal swab		Illumina iSeq100	Dragen			B.1.1.325	GR
hCoV-19/Ukraine/D01/2021	EPI_ISL_953938	2021-01-14	Europe / Ukraine / Kyiv	Human	Original	Oropharyngeal swab		Illumina MiSeq		NSP2_ins150FCstopSHLRIL results in 76.6% truncation of the protein sequence. NSP2_ins245stopQVCLLGS results in 61.8% truncation of the protein sequence. NSP2_ins427FSstop results in 33.2% truncation of the protein sequence. NSP2_S248stop results in 61.3% truncation of the protein sequence. NSP2_G581stop results in 9.1% truncation of the protein sequence. NSP2_E527stop results in 17.6% truncation …	warn	B.1.627	O
hCoV-19/Ukraine/D001/2021	EPI_ISL_954750	2021-01-14	Europe / Ukraine / Kyiv	Human	Original	Oropharyngeal swab		Illumina MiSeq		NSP2_ins427FSstop results in 33.2% truncation of the protein sequence. NSP2_E527stop results in 17.6% truncation of the protein sequence. NSP2_E595stop results in 6.9% truncation of the protein sequence. NSP2_L572stop results in 10.5% truncation of the protein sequence. NSP2_F83stop results in 87.1% truncation of the protein sequence. NSP2_L350stop results in 45.3% truncation of the protein seque…	warn	B.1.627	O
hCoV-19/Ukraine/Vinnytsia_12/2020	EPI_ISL_979970	2020-05-27	Europe / Ukraine / Vinnytsia	Human	Original	Nasopharyngeal swab		Illumina iSeq100	Dragen			B.1.131	G
hCoV-19/Ukraine/Uzhgorod_36/2020	EPI_ISL_979971	2020-05-28	Europe / Ukraine / Uzhgorod	Human	Original	Nasopharyngeal swab		Illumina iSeq100	Dragen			B.1.527	G
hCoV-19/Ukraine/Rivne_55/2020	EPI_ISL_979972	2020-06-04	Europe / Ukraine / Rivne	Human	Original	Nasopharyngeal swab		Illumina iSeq100	Dragen			B.1	G
hCoV-19/Ukraine/Kyiv_58/2020	EPI_ISL_979973	2020-06-05	Europe / Ukraine / Kyiv	Human	Original	Nasopharyngeal swab		Illumina iSeq100	Dragen			B.1.1.1	GR
hCoV-19/Crimea/RII-MH9353S/2020	EPI_ISL_1400527	2020-10-11	Europe / Crimea / Oktyabrskoe	Human	Original	Nasopharyngeal swab		Illumina MiSeq	bwa, samtools, ivar, lofreq	Long stretches of NNNs (5.05% of overall sequence). Insertion of 2 nucleotide(s) found at refpos 28251 (frameshift confirmed by the submitter).	alert	B.1.1.373	GR
hCoV-19/Crimea/RII-MH3433S/2020	EPI_ISL_1400557	2020-10-06	Europe / Crimea / Yevpatoriya	Human	Original	Nasopharyngeal swab		Illumina MiSeq	bwa, samtools, ivar, lofreq	Gap of 7 nucleotide(s) found at refpos 27794 (frameshift confirmed by the submitter).	info	B.1.1	GR
hCoV-19/Crimea/UA43-CRIE-L189B0546b/2021	EPI_ISL_2031957	2021-04-02	Europe / Crimea	Human	Original	Oropharyngeal swab		Illumina	bowtie2 mapping + consensus			B.1	GR
hCoV-19/Crimea/CR-CRIE-L189Z0141ubh/2021	EPI_ISL_3101330	2021-05-29	Europe / Crimea	Human	Original	Oro-pharyngeal swab		Illumina	bowtie2 mapping + consensus	Long stretches of NNNs (7.17% of overall sequence). Gap of 7 nucleotides when compared to the reference sequence.	alert	B.1.617.2	G
hCoV-19/Crimea/CR-CRIE-L191D0338ub/2021	EPI_ISL_3101347	2021-02-08	Europe / Crimea	Human	Original	Oro-pharyngeal swab		Illumina	bowtie2 mapping + consensus	Long stretches of NNNs (5.09% of overall sequence). Insertion of 12 nucleotides when compared to the reference sequence. Gap of 27 nucleotides when compared to the reference sequence. %UniqueMutations 0.06%.	alert	AT.1	GR
hCoV-19/Crimea/RII-MH29235S/2021	EPI_ISL_3122988	2021-07-01	Europe / Crimea / Simferopol	Human	Original	Nasopharyngeal swab		Illumina HiSeq	bwa, samtools, ivar, lofreq	Long stretches of NNNs (5.27% of overall sequence). Gap of 13 nucleotides when compared to the reference sequence.	alert	B.1.617.2	GK
hCoV-19/Crimea/RII-MH29236S/2021	EPI_ISL_3122989	2021-07-01	Europe / Crimea / Simferopol	Human	Original	Nasopharyngeal swab		Illumina HiSeq	bwa, samtools, ivar, lofreq	Stretches of NNNs (1.14% of overall sequence). Gap of 13 nucleotides when compared to the reference sequence.	warn	B.1.617.2	GK
hCoV-19/Crimea/RII-MH29237S/2021	EPI_ISL_3122990	2021-07-01	Europe / Crimea / Simferopol	Human	Original	Nasopharyngeal swab		Illumina HiSeq	bwa, samtools, ivar, lofreq	Gap of 13 nucleotides when compared to the reference sequence.	info	B.1.617.2	GK
hCoV-19/Crimea/RII-MH29238S/2021	EPI_ISL_3122991	2021-07-01	Europe / Crimea / Simferopol	Human	Original	Nasopharyngeal swab		Illumina HiSeq	bwa, samtools, ivar, lofreq	Stretches of NNNs (4.79% of overall sequence). Gap of 13 nucleotides when compared to the reference sequence.	warn	B.1.617.2	GK
hCoV-19/Crimea/RII-MH29239S/2021	EPI_ISL_3122992	2021-07-01	Europe / Crimea / Simferopol	Human	Original	Nasopharyngeal swab		Illumina HiSeq	bwa, samtools, ivar, lofreq	Stretches of NNNs (2.96% of overall sequence). Gap of 13 nucleotides when compared to the reference sequence.	warn	AY.16	GK
hCoV-19/Crimea/RII-MH29240S/2021	EPI_ISL_3122993	2021-07-01	Europe / Crimea / Simferopol	Human	Original	Nasopharyngeal swab		Illumina HiSeq	bwa, samtools, ivar, lofreq	Stretches of NNNs (4.21% of overall sequence). Gap of 13 nucleotides when compared to the reference sequence.	warn	B.1.617.2	GK
hCoV-19/Crimea/RII-MH29241S/2021	EPI_ISL_3122994	2021-07-01	Europe / Crimea / Simferopol	Human	Original	Nasopharyngeal swab		Illumina HiSeq	bwa, samtools, ivar, lofreq	Gap of 13 nucleotides when compared to the reference sequence.	info	B.1.617.2	GK
hCoV-19/Crimea/RII-MH29242S/2021	EPI_ISL_3122995	2021-07-01	Europe / Crimea / Simferopol	Human	Original	Nasopharyngeal swab		Illumina HiSeq	bwa, samtools, ivar, lofreq	Long stretches of NNNs (8.21% of overall sequence). Gap of 13 nucleotides when compared to the reference sequence. NSP11 without BLAST coverage.	alert	B.1.617.2	GK
hCoV-19/Crimea/Crimea-RII-MH29243S/2021	EPI_ISL_3122996	2021-07-01	Europe / Crimea / Simferopol	Human	Original	Nasopharyngeal swab		Illumina HiSeq	bwa, samtools, ivar, lofreq	Stretches of NNNs (1.59% of overall sequence). Gap of 23 nucleotide(s) found at refpos 27571 (frameshift confirmed by the submitter). NS7a_ins60stopRRK results in 51.2% truncation of the protein sequence. Gap of 36 nucleotides when compared to the reference sequence.	warn	B.1.617.2	GK
hCoV-19/Crimea/RII-MH29244S/2021	EPI_ISL_3122997	2021-07-01	Europe / Crimea / Simferopol	Human	Original	Nasopharyngeal swab		Illumina HiSeq	bwa, samtools, ivar, lofreq	Long stretches of NNNs (5.04% of overall sequence). Gap of 13 nucleotides when compared to the reference sequence.	alert	B.1.617.2	GK
hCoV-19/Crimea/RII-MH29245S/2021	EPI_ISL_3122998	2021-07-01	Europe / Crimea / Simferopol	Human	Original	Nasopharyngeal swab		Illumina HiSeq	bwa, samtools, ivar, lofreq	Stretches of NNNs (3.37% of overall sequence). Gap of 13 nucleotides when compared to the reference sequence.	warn	B.1.617.2	GK
hCoV-19/Crimea/RII-MH29253S/2021	EPI_ISL_3122999	2021-07-01	Europe / Crimea / Simferopol	Human	Original	Nasopharyngeal swab		Illumina HiSeq	bwa, samtools, ivar, lofreq	Stretches of NNNs (2.31% of overall sequence). Gap of 13 nucleotides when compared to the reference sequence.	warn	B.1.617.2	GK
hCoV-19/Crimea/RII-MH29254S/2021	EPI_ISL_3123000	2021-07-01	Europe / Crimea / Simferopol	Human	Original	Nasopharyngeal swab		Illumina HiSeq	bwa, samtools, ivar, lofreq	Stretches of NNNs (2.10% of overall sequence). Gap of 13 nucleotides when compared to the reference sequence.	warn	B.1.617.2	GK
hCoV-19/Crimea/RII-MH29255S/2021	EPI_ISL_3123001	2021-07-01	Europe / Crimea / Simferopol	Human	Original	Nasopharyngeal swab		Illumina HiSeq	bwa, samtools, ivar, lofreq	Gap of 13 nucleotides when compared to the reference sequence.	info	B.1.617.2	GK
hCoV-19/Crimea/RII-MH29257S/2021	EPI_ISL_3123002	2021-07-01	Europe / Crimea / Simferopol	Human	Original	Nasopharyngeal swab		Illumina HiSeq	bwa, samtools, ivar, lofreq	Gap of 13 nucleotides when compared to the reference sequence.	info	B.1.617.2	GK
hCoV-19/Crimea/RII-MH29258S/2021	EPI_ISL_3123003	2021-07-01	Europe / Crimea / Simferopol	Human	Original	Nasopharyngeal swab		Illumina HiSeq	bwa, samtools, ivar, lofreq	Gap of 13 nucleotides when compared to the reference sequence.	info	B.1.617.2	GK
hCoV-19/Crimea/RII-MH29259S/2021	EPI_ISL_3123004	2021-07-01	Europe / Crimea / Simferopol	Human	Original	Nasopharyngeal swab		Illumina HiSeq	bwa, samtools, ivar, lofreq	Insertion of 3 nucleotides when compared to the reference sequence. Gap of 9 nucleotides when compared to the reference sequence.	info	B.1.1.523	GR
hCoV-19/Crimea/RII-MH29260S/2021	EPI_ISL_3123005	2021-07-01	Europe / Crimea / Simferopol	Human	Original	Nasopharyngeal swab		Illumina HiSeq	bwa, samtools, ivar, lofreq	Gap of 13 nucleotides when compared to the reference sequence.	info	B.1.617.2	GK
hCoV-19/Crimea/RII-MH29265S/2021	EPI_ISL_3123006	2021-07-01	Europe / Crimea / Simferopol	Human	Original	Nasopharyngeal swab		Illumina HiSeq	bwa, samtools, ivar, lofreq	Stretches of NNNs (3.96% of overall sequence). Gap of 7 nucleotides when compared to the reference sequence.	warn	B.1.617.2	GK
hCoV-19/Crimea/RII-MH29266S/2021	EPI_ISL_3123007	2021-07-01	Europe / Crimea / Simferopol	Human	Original	Nasopharyngeal swab		Illumina HiSeq	bwa, samtools, ivar, lofreq	Gap of 13 nucleotides when compared to the reference sequence.	info	B.1.617.2	GK
hCoV-19/Crimea/RII-MH29268S/2021	EPI_ISL_3123008	2021-07-01	Europe / Crimea / Simferopol	Human	Original	Nasopharyngeal swab		Illumina HiSeq	bwa, samtools, ivar, lofreq	NS7a_G38stop results in 69.4% truncation of the protein sequence. Gap of 13 nucleotides when compared to the reference sequence.	info	B.1.617.2	GK
hCoV-19/Crimea/CRIE-L189F2805u/2021	EPI_ISL_3932047	2021-03-10	Europe / Crimea	Human	Original	Oropharyngeal swab		Illumina	bowtie2 mapping + consensus	Stretches of NNNs (1.29% of overall sequence). NS8_K68stop results in 44.6% truncation of the protein sequence. NS8_Q27stop results in 78.5% truncation of the protein sequence. Gap of 19 nucleotides when compared to the reference WIV04 sequence. NS6 without BLAST coverage.	warn	B.1.1.7	GR
hCoV-19/Crimea/CRIE-L219D0004/2021	EPI_ISL_3996685	2021-07-05	Europe / Crimea	Human	Original	Oropharyngeal swab		Illumina	bowtie2 mapping + consensus	Gap of 13 nucleotides when compared to the reference WIV04 sequence.	info	B.1.617.2	GK
hCoV-19/Crimea/CRIE-L219D0007/2021	EPI_ISL_3996686	2021-07-05	Europe / Crimea	Human	Original	Oropharyngeal swab		Illumina	bowtie2 mapping + consensus	Gap of 13 nucleotides when compared to the reference WIV04 sequence.	info	B.1.617.2	GK
hCoV-19/Crimea/CRIE-L219D0006/2021	EPI_ISL_3996687	2021-07-05	Europe / Crimea	Human	Original	Oropharyngeal swab		Illumina	bowtie2 mapping + consensus	Gap of 13 nucleotides when compared to the reference WIV04 sequence.	info	B.1.617.2	GK
hCoV-19/Crimea/CRIE-L219D0003/2021	EPI_ISL_3996688	2021-07-05	Europe / Crimea	Human	Original	Oropharyngeal swab		Illumina	bowtie2 mapping + consensus	Gap of 13 nucleotides when compared to the reference WIV04 sequence.	info	B.1.617.2	GK
hCoV-19/Crimea/SRC-80603/2020	EPI_ISL_428901	2020-03-23	Europe / Crimea	Human	Vero	Oropharyngeal swab		Illumina MiSeq	bwa v0.7.15, IGV v2.4.14			B.1	G
hCoV-19/Crimea/RII-MH2936S/2020	EPI_ISL_733077	2020-09-21	Europe / Crimea / Simpheropol	Human	Original	Nasopharyngeal swab		Illumina MiSeq	bwa, samtools, ivar, lofreq			B.1.1	GR
hCoV-19/Crimea/RII-MH2937S/2020	EPI_ISL_733078	2020-09-21	Europe / Crimea / Alushta	Human	Original	Nasopharyngeal swab		Illumina MiSeq	bwa, samtools, ivar, lofreq	Stretches of NNNs (3.62% of overall sequence).	warn	B.1.1	GR
hCoV-19/Crimea/RII-MH3437S/2020	EPI_ISL_733151	2020-10-07	Europe / Crimea / Simpheropol	Human	Original	Nasopharyngeal swab		Illumina MiSeq	bwa, samtools, ivar, lofreq			B.1.1.274	GR
hCoV-19/Crimea/RII-MH9286S/2020	EPI_ISL_733433	2020-10-13	Europe / Crimea / Yevpatoriya	Human	Original	Nasopharyngeal swab		Illumina MiSeq	bwa, samtools, ivar, lofreq	Stretches of NNNs (1.10% of overall sequence).	warn	B.1.1	GR
hCoV-19/Crimea/RII-MH9362S/2020	EPI_ISL_733452	2020-10-14	Europe / Crimea / Novofedorovka	Human	Original	Nasopharyngeal swab		Illumina MiSeq	bwa, samtools, ivar, lofreq	Stretches of NNNs (1.62% of overall sequence).	warn	B.1.1.349	GR
hCoV-19/Russia/43-CRIE-L191P1474u/2021	EPI_ISL_4536678	2021-06-23	Europe / Russia / Crimea	Human	Original	Oropharyngeal swab		Illumina	bowtie2 mapping + consensus	Long stretches of NNNs (11.92% of overall sequence). Gap of 28 nucleotides when compared to the reference WIV04 sequence.	alert	B.1.617.2	GK
hCoV-19/Russia/43-CRIE-L106P1414u/2021	EPI_ISL_4536683	2021-06-22	Europe / Russia / Crimea	Human	Original	Oropharyngeal swab		Illumina	bowtie2 mapping + consensus	Long stretches of NNNs (12.33% of overall sequence). Gap of 7 nucleotides when compared to the reference WIV04 sequence.	alert	B.1.617.2	GK
hCoV-19/Russia/43-CRIE-L189P1741u/2021	EPI_ISL_4536741	2021-06-22	Europe / Russia / Crimea	Human	Original	Oropharyngeal swab		Illumina	bowtie2 mapping + consensus	Long stretches of NNNs (24.30% of overall sequence). Gap of 7 nucleotides when compared to the reference WIV04 sequence. NS7a without BLAST coverage.	alert	None	G
hCoV-19/Russia/43-CRIE-L191P1479u/2021	EPI_ISL_4536770	2021-06-22	Europe / Russia / Crimea	Human	Original	Oropharyngeal swab		Illumina	bowtie2 mapping + consensus	Long stretches of NNNs (6.31% of overall sequence). Gap of 7 nucleotides when compared to the reference WIV04 sequence.	alert	B.1.617.2	GK
hCoV-19/Russia/43-CRIE-L189P1743u/2021	EPI_ISL_4558178	2021-06-22	Europe / Russia / Crimea	Human	Original	Oropharyngeal swab		Illumina	bowtie2 mapping + consensus	Long stretches of NNNs (25.70% of overall sequence). Gap of 11 nucleotide(s) found at refpos 7313 (Frameshift confirmed by submitter). Gap of 18 nucleotides when compared to the reference WIV04 sequence. NSP4 without BLAST coverage.	alert	AY.26	G
